# Supplementary material for: C. elegans ageing is accelerated by a self-destructive reproductive programme
Source: Springer Nature journal article supplement (doi:10.1038/s41467-023-40088-1), 2023-07-20
Supplement: MOESM1 [file 41467_2023_40088_MOESM1_ESM.pdf]

## Supplementary Information

### ***C. elegans* ageing is accelerated by a self-destructive reproductive programme**

Kern et al. (2022)

**Supplementary Figure 1.** Greater vitellogenin accumulation and venting in hermaphrodites than females.

**Supplementary Figure 2.** More severe senescent pathology and shorter lifespan in hermaphroditic species.

**Supplementary Figure 3.** Degenerative changes in ultrastructure in hermaphrodites undergoing putative reproductive death.

**Supplementary Figure 4.** Putative reproductive death is constitutive in hermaphrodites and mating-induced in females.

**Supplementary Figure 5.** Mating induces putative reproductive death and reduces lifespan in females.

**Supplementary Figure 6.** Germline ablation suppresses severe senescent pathologies in hermaphrodites.

**Supplementary Figure 7.** Germline ablation greatly extends lifespan in hermaphrodites but not females.

**Supplementary Figure 8.** Putative reproductive death is promoted by insulin/IGF-1 signalling (IIS).

**Supplementary Figure 9.** Sequence alignment of *fem-3*.

**Supplementary Table 1.** Female sibling species are longer lived than hermaphrodites when bacterial pathogenicity is excluded.

**Supplementary Table 2.** Comparison of hermaphrodite and female sibling species lifespans following mating.

**Supplementary Table 3.** Comparison of lifespans of feminised and wild-type hermaphrodites, and female sibling species.

**Supplementary Table 4.** Comparison of lifespans of hermaphrodite and female sibling species following germline ablation.

**Supplementary Table 5.** Orthologues of *C. elegans fog-2*.

**Supplementary Table 6.** Orthologues of *C. elegans fem-3*.

**Supplementary Table 7.** List of primers used for the dsRNA synthesis.

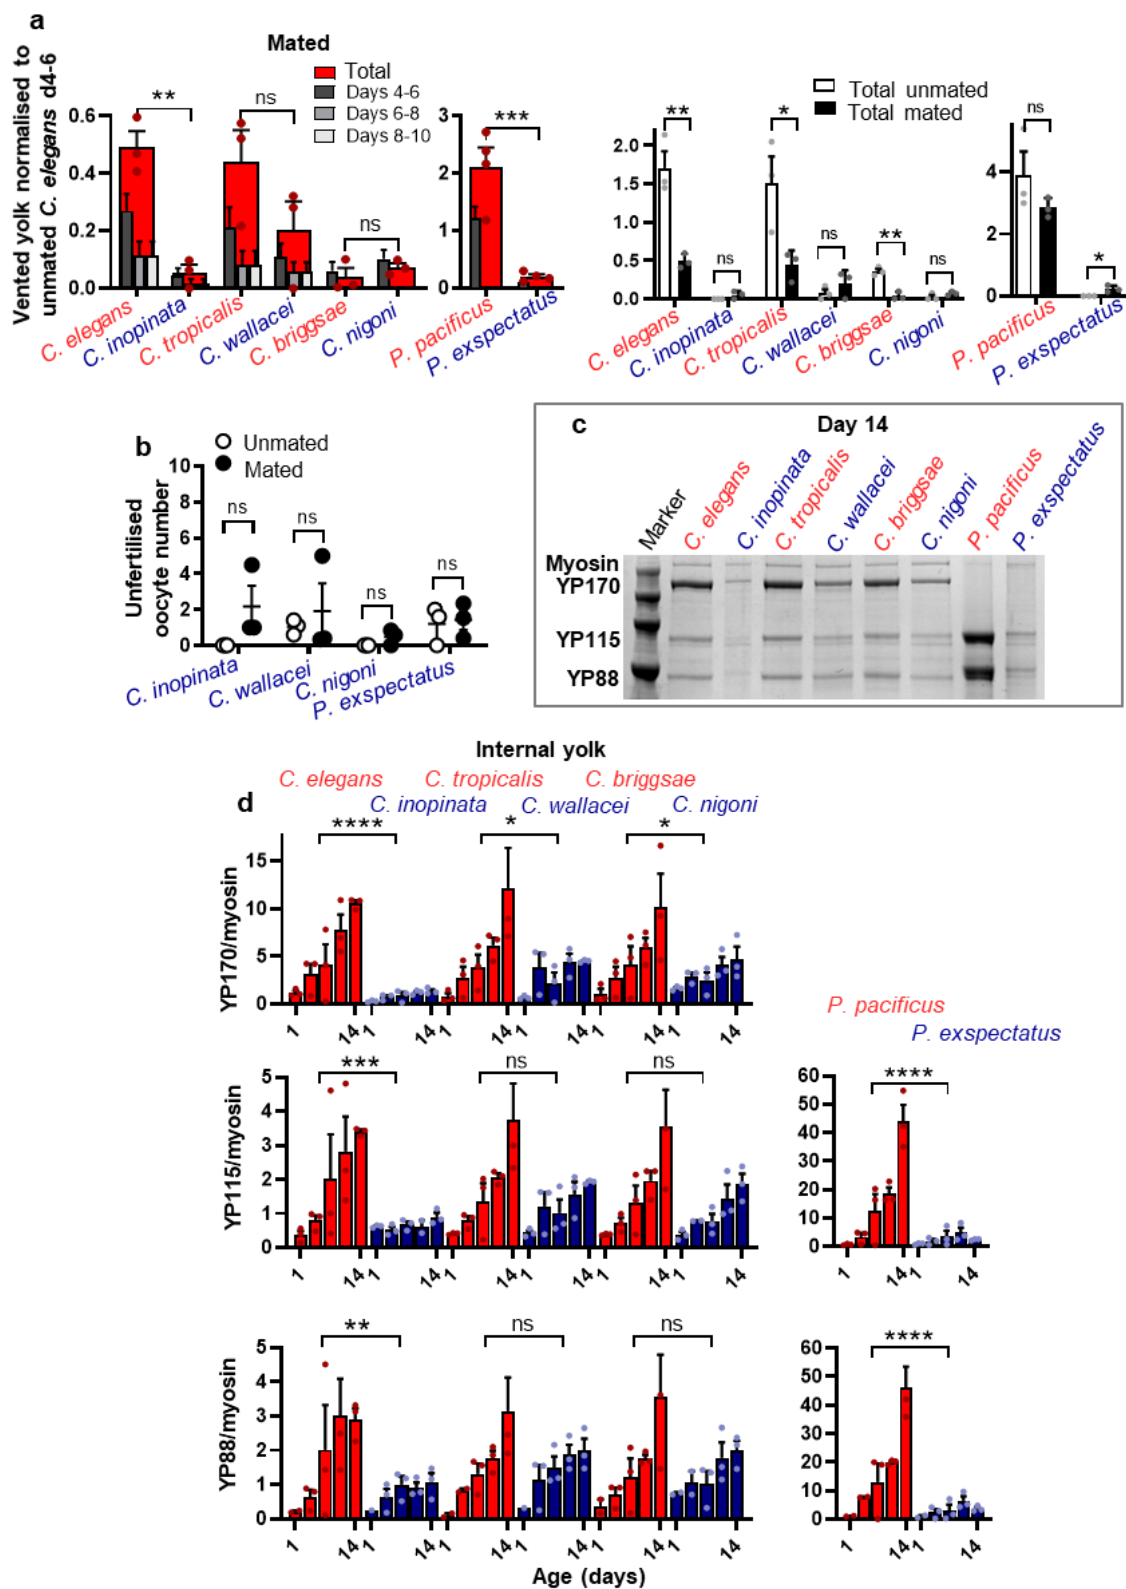

**Supplementary Figure 1. Greater vitellogenin accumulation and venting in hermaphrodites than females.** **a** Mating reduces venting in hermaphrodites and has little effect on venting by females. Vented YP170 in mated *Caenorhabditis* species and YP115 in mated *Pristionchus*

species. Data normalised to unmated *C. elegans* peak venting period, d4-6 (c.f. Fig. 1b). Mating reduces levels of venting in hermaphrodites, which may reflect vitellogenin uptake by the additional oocytes that become eggs due to increased sperm availability. **b** Mating does not significantly increase unfertilised oocyte production in females. **a, b** One-way ANOVA (Bonferroni correction) and one-sample t-test (two-tailed) used based on the number of samples being compared. **c, d** Greater internal levels of YP170 in *Caenorhabditis* hermaphrodites, and YP115/YP88 in *P. pacificus* hermaphrodites (*Pristionchus* lack YP170). YP bands normalised to myosin to adjust for species differences in body size. One-way ANCOVA. **a, c, d** Protein gel electrophoresis data with colloidal Coomassie blue staining. For full gel see Source Data. Mean  $\pm$  s.e.m. of 3 trials displayed. \*  $p < 0.05$ , \*\*  $p < 0.01$ , \*\*\*  $p < 0.0001$ , \*\*\*\*  $p < 0.00001$  ( $p$  value from left to right = **a left**: 0.0022, 0.1901, 0.3904, 0.0002; **a right**: 0.0057, 0.1321, 0.0416, 0.3310, 0.0020, 0.2028, 0.2458, 0.0223; **b**: 0.2164, 0.8888, 0.9876, 0.9993; **d top**: 0.0000, 0.0133, 0.0133; **d middle**: 0.0006, 0.1316, 0.1316, 0.0000; **d bottom**: 0.0070, 0.2604, 0.2085, 0.0000).

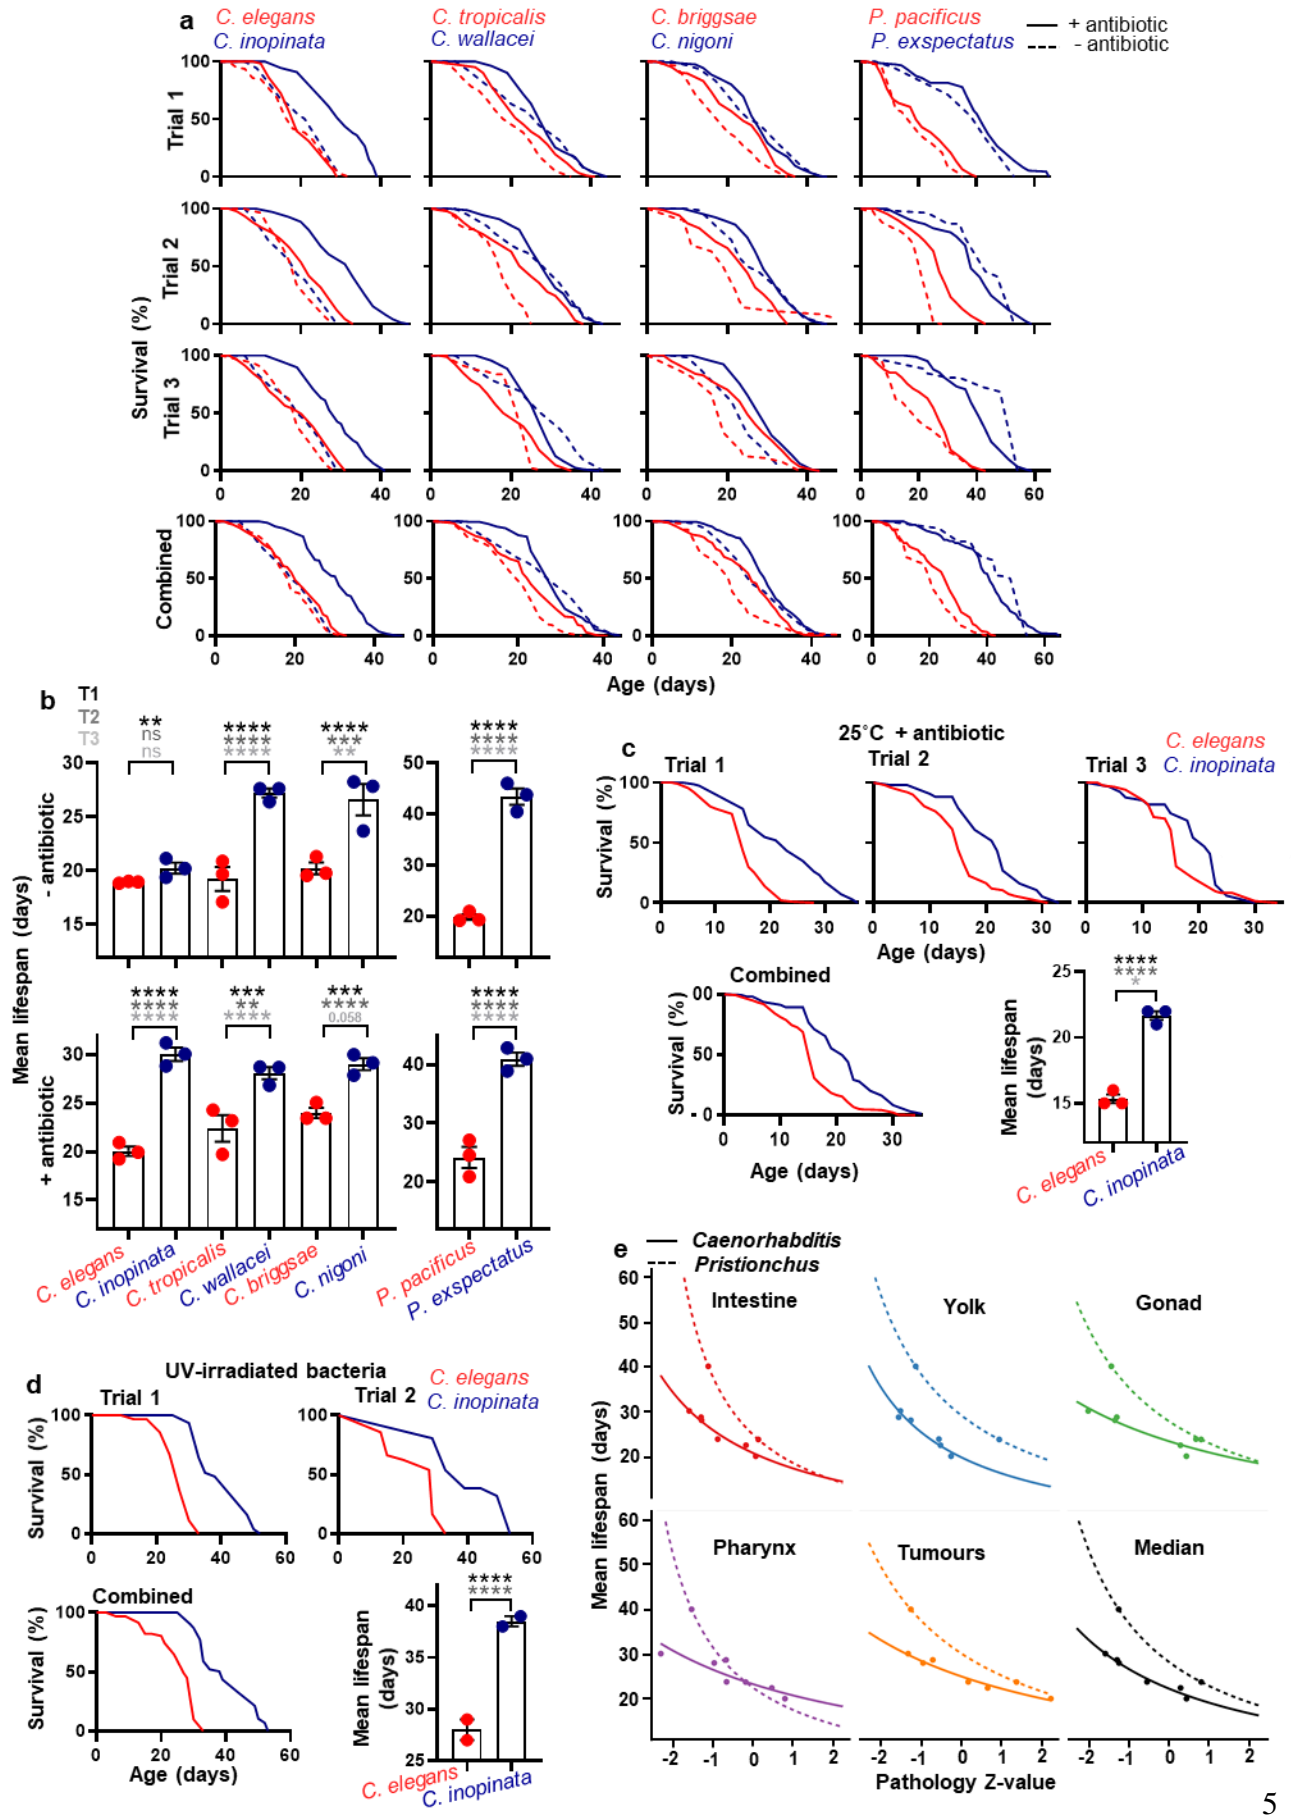

**Supplementary Figure 2. More severe senescent pathology and shorter lifespan in hermaphroditic species.** **a,b** Survival curves from individual and combined trials of sibling species. In the presence of antibiotics, females are longer lived in all cases (n=100 per trial). **c** *C. inopinata* is also longer lived than *C. elegans* at 25°C (with carbenicillin), a more optimal culture temperature for the former species (n=100 per trial). **d** *C. inopinata* is also longer-lived than *C. elegans* where both are maintained on UV-irradiated *E. coli* (n=100 per trial). **e** Linear regression comparing each individual pathology and median of all pathologies to lifespan. The Z-scores for all pathologies were found to be statistically significant, and the median pathology Z-score was found to perform better than the individual pathologies. This suggests that lifespan is a function of overall pathology level. X axis, pathology Z-score calculated from pathology measurements through time (c.f. Supplemental Fig. 4a). Y axis, mean lifespan. A line of best fit is drawn for *Caenorhabditis* species and based on this a hypothetical line is drawn for the *Pristionchus* species. \*  $p < 0.05$ , \*\*  $p < 0.01$ , \*\*\*  $p < 0.0001$ , \*\*\*\*  $p < 0.00001$  by Log rank test for pairs of individual trials, and mean  $\pm$  s.e.m. of 3 trials with each dot representing one trial displayed. For details on statistics and raw lifespan data see Supplemental Table 1 and Source Data File, respectively.

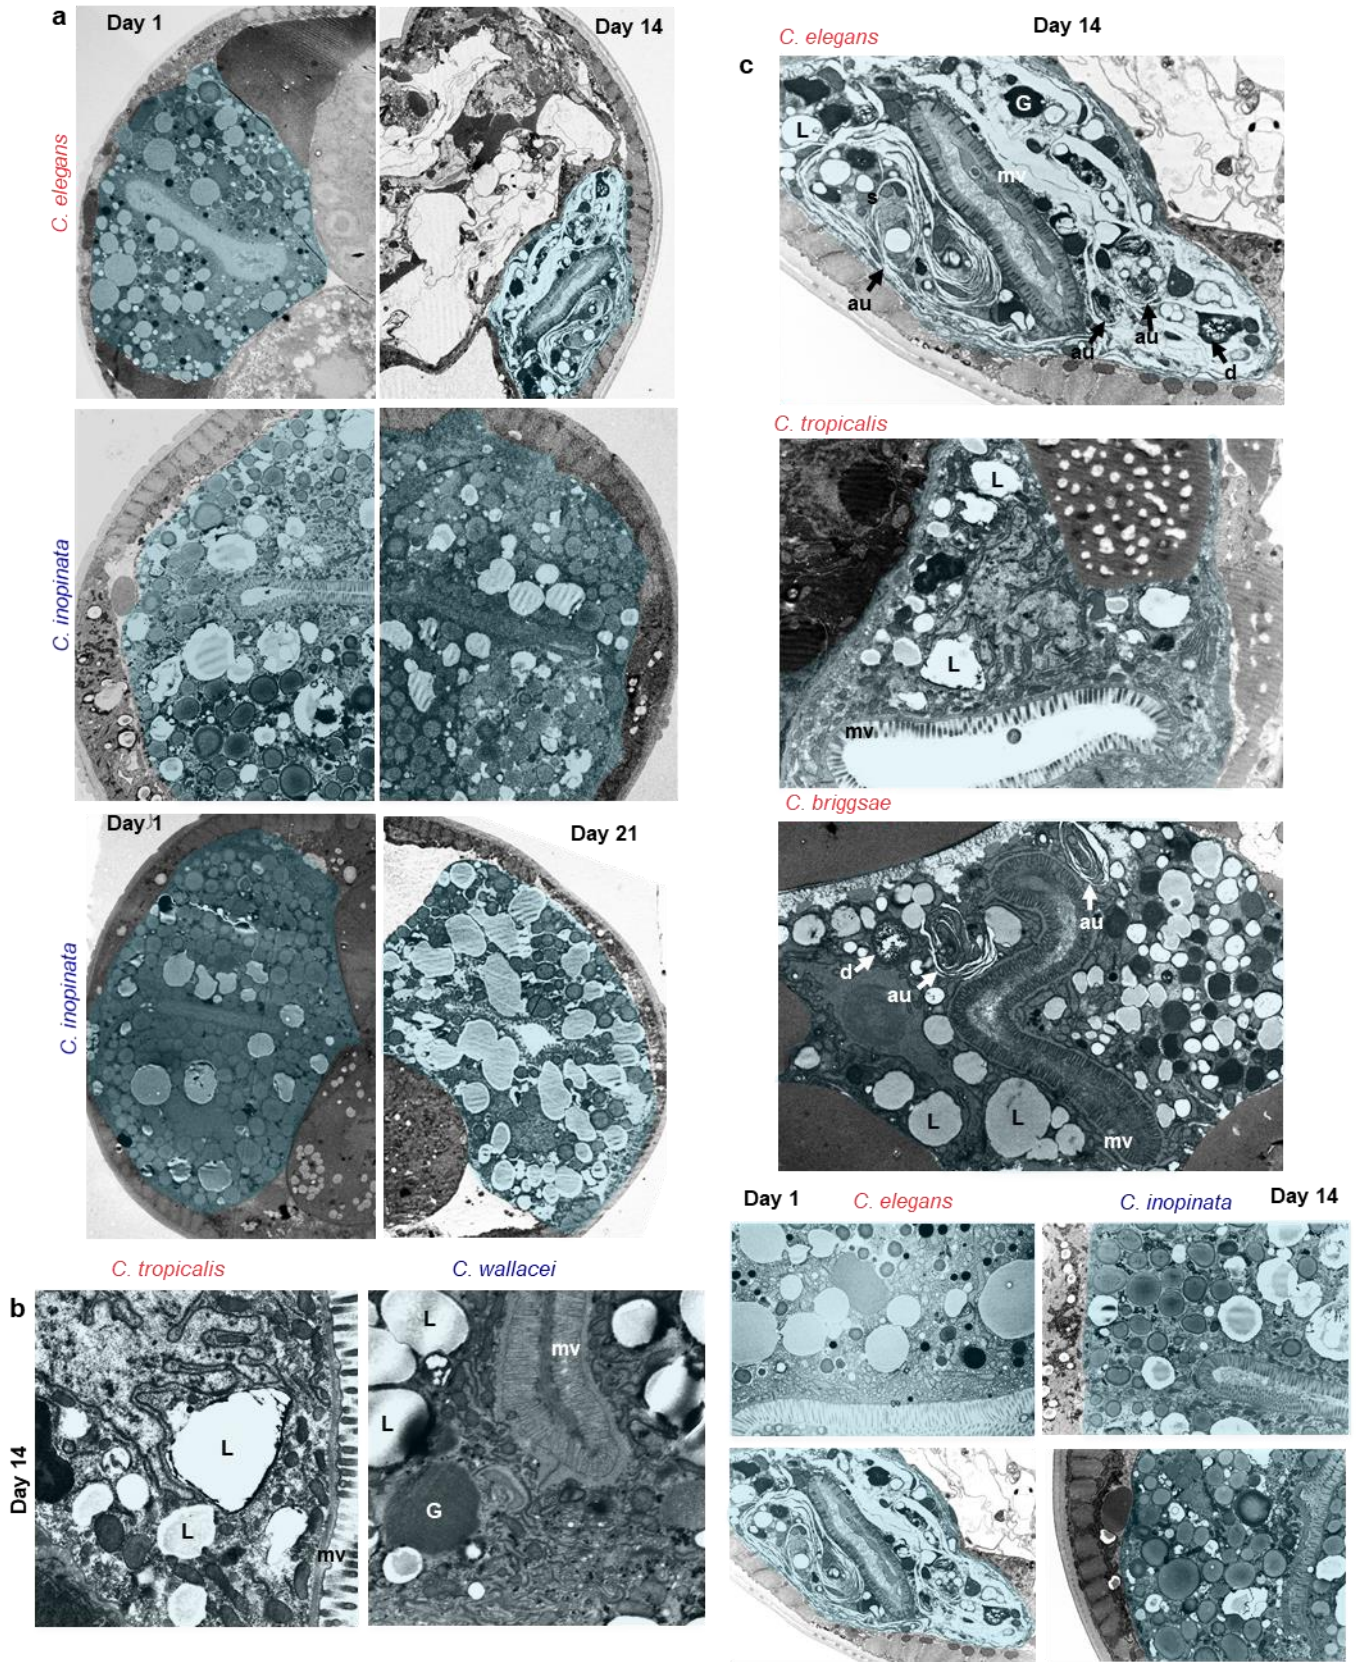

**Supplementary Figure 3. Degenerative changes in ultrastructure in hermaphrodites undergoing putative reproductive death. a** Low magnification representative TEM showing intestinal atrophy in

*C. elegans* with age and little change in intestinal size in *C. inopinata* even by d21. Halves of nematode sibling species pairs are taken from approximately the same region of the animal (between the posterior end of the posterior uterus and the anus) to avoid the distorting (gut crushing) effects of uterine tumours. Scale 5  $\mu\text{m}$  (5,000x). **b** *C. tropicalis* and *C. wallacei* on d14 showing greater ultrastructural degeneration in the former (c.f. Fig. 2f). Scale 1  $\mu\text{m}$  (20,000x). **c** Hermaphroditic *Caenorhabditis* species showing intestinal degeneration on d14 and comparison to *C. inopinata*. Scale 1  $\mu\text{m}$  (10,000x). Blue, intestine. mv: microvilli; au: autophagosomes; note characteristic multilamellar structure in some cases; L: lipid droplets; G: yolk granules or gut granules (tentative interpretation; gut granules have yet to be clearly identified in TEM studies; D. Hall personal communication).



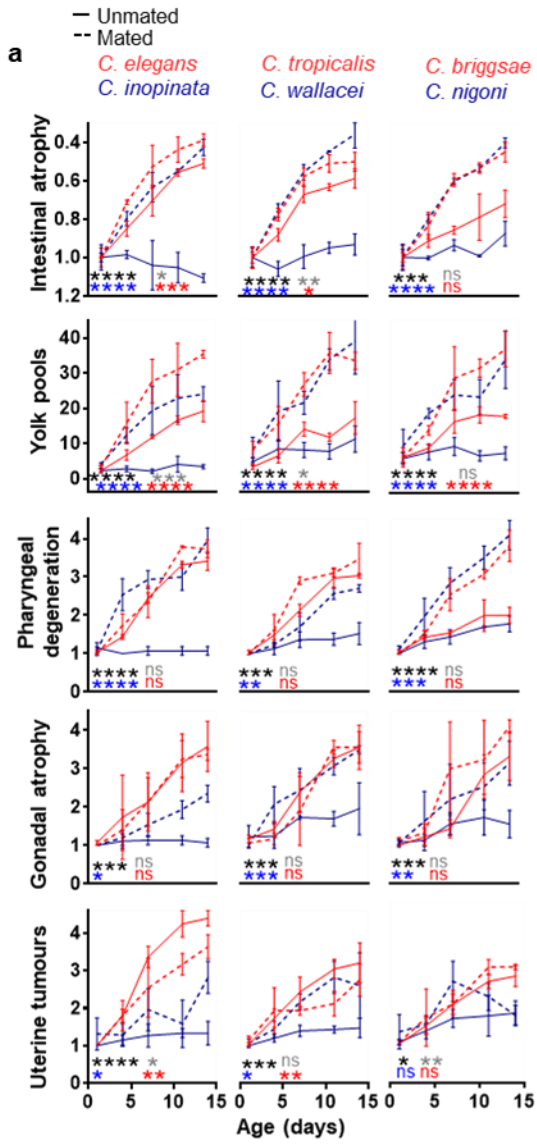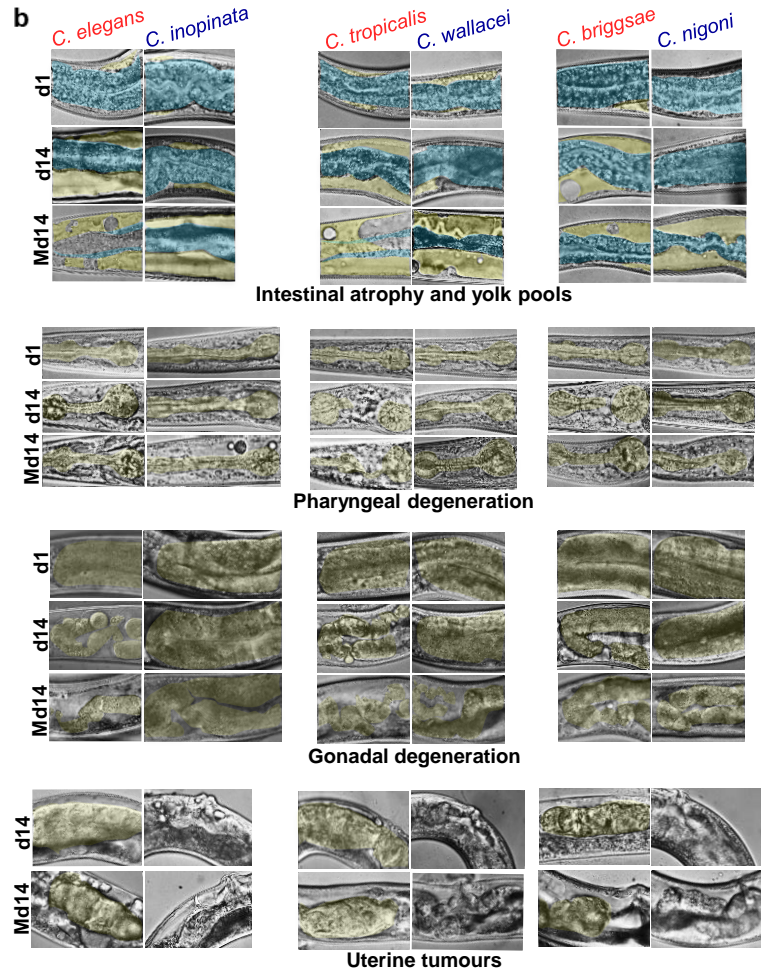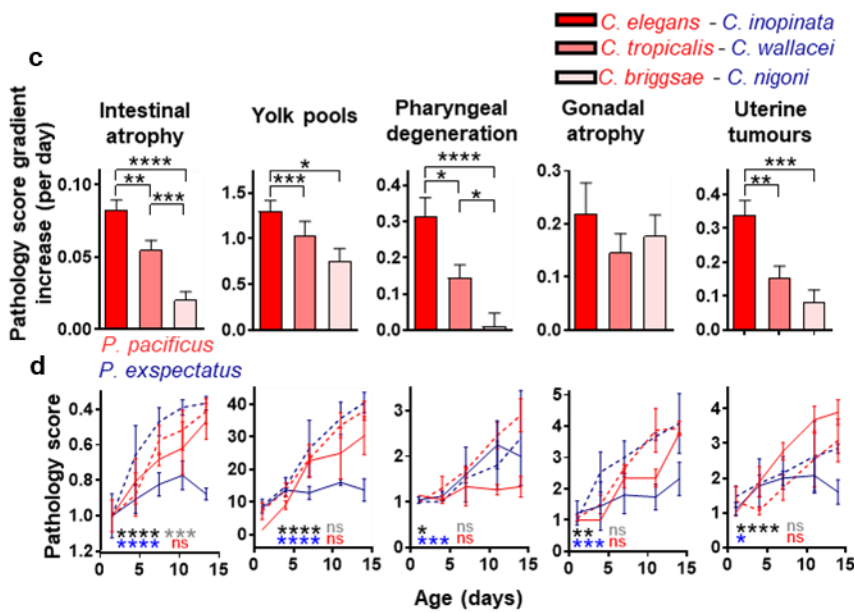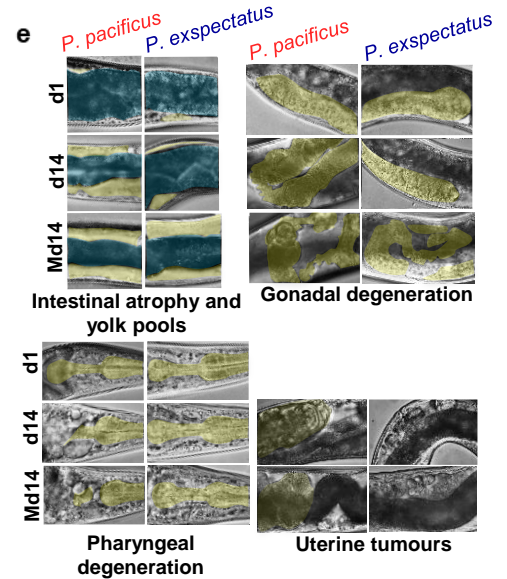

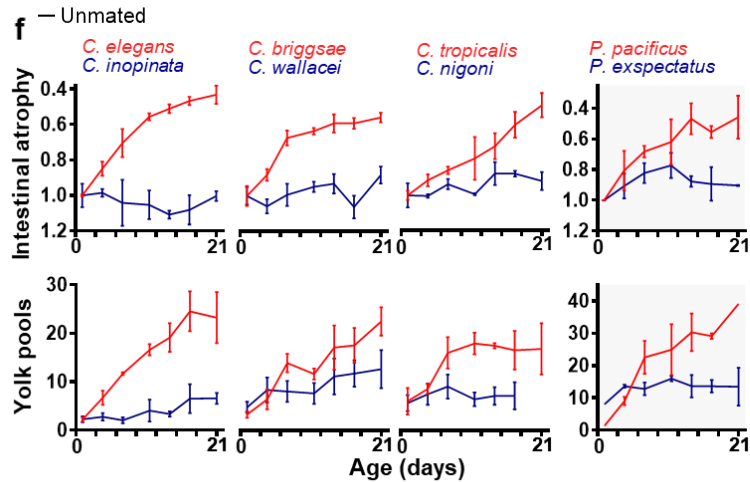

**Supplementary Figure 4. Putative reproductive death is constitutive in hermaphrodites and mating-induced in females.** **a, d** Severe pathology progression in unmated hermaphrodites and mated animals but not virgin females. Tests for statistical significance: black, hermaphrodites vs females; red: mated vs unmated hermaphrodites; blue: mated vs unmated females; grey: mated hermaphrodites vs mated females. Mean  $\pm$  s.e.m. of 3 trials displayed ( $n=10$  per time point per trial). **b, e** Representative Nomarski microscopy images taken for the purpose of scoring/measuring pathologies. Note the position of the gonad around the intestine is different in *Pristionchus* species, with the full gonad arm visible in the same plane only after intestinal atrophy. Yellow: yolk pools, gonad and uterine tumours; blue: intestine. **c** Bar graphs showing difference in gradient between species pairs, defining the following gradient in difference in severity for most pathologies: *C. elegans* - *C. inopinata* > *C. tropicalis* - *C. wallacei* > *C. briggsae* - *C. nigoni*. Subtraction rather than normalisation is used as gradients are already relative values. Mean  $\pm$  s.t.d. of combined data ( $n=30$  per time point per trial). **f** No increase in intestinal atrophy even up to day 21 in unmated females (c.f. panel a); Mean  $\pm$  s.e.m. of 3 trials;  $n=10$  per time point per trial. \*  $p < 0.05$ , \*\*  $p < 0.01$ , \*\*\*  $p < 0.0001$ , \*\*\*\*  $p < 0.00001$  by Cumulative Link Model with gamma link function for pharyngeal degeneration, gonadal degeneration and uterine tumours which are scored ordinals. One-way ANCOVA with score normalised to d1 to determine change in percentage of intestinal mass, and one-way ANCOVA with no normalisation for yolk pools.

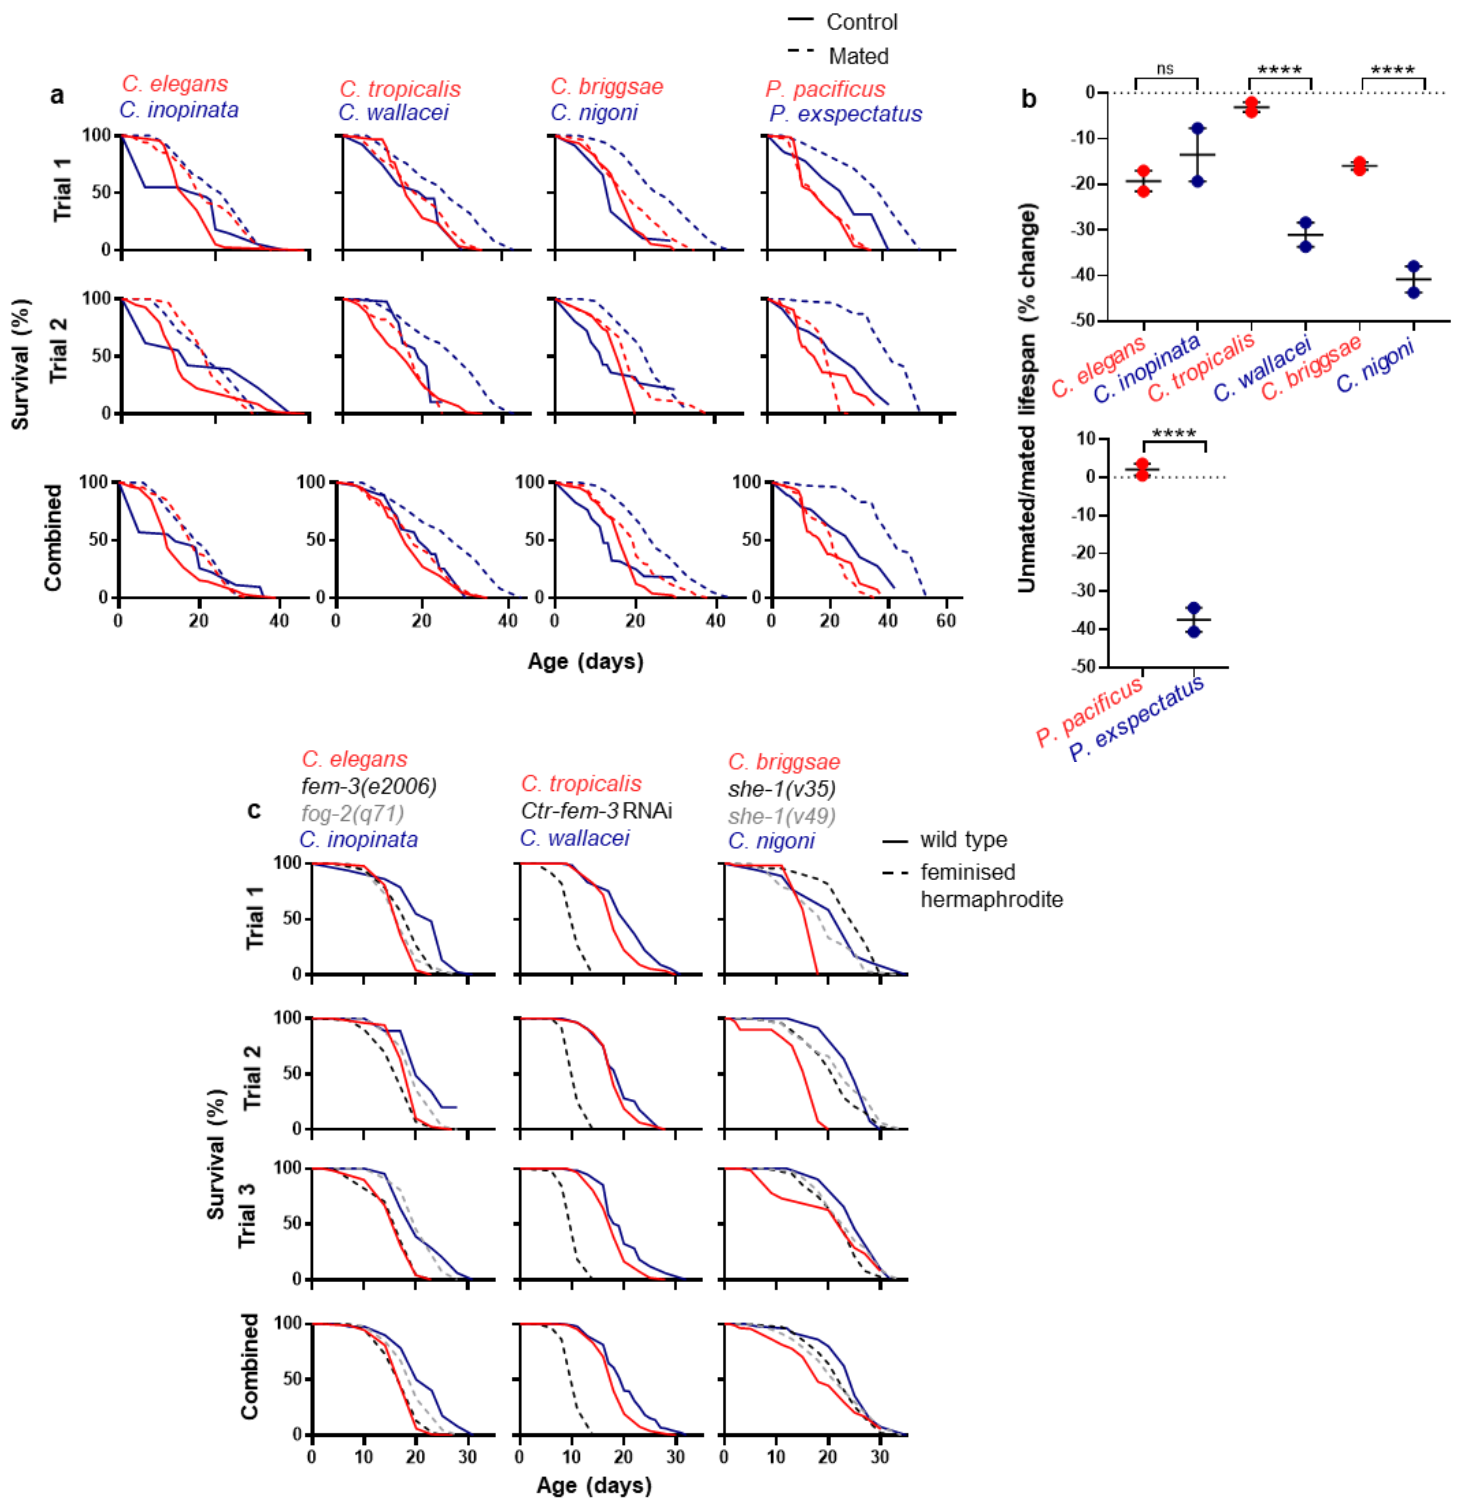

**Supplementary Figure 5. Mating induces putative reproductive death and reduces lifespan in females.** **a** Mating in females significantly reduces lifespan, as previously shown for *C. elegans*<sup>1, 2, 3</sup>. **b** Cox proportional hazard analysis showing greater effect of mating in most females; the lack

of a greater reduction in *C. inopinata* than *C. elegans* could reflect the greater susceptibility of the former to bacterial infection. Mean  $\pm$  s.e.m. of 2 trials displayed. **c.** Female sibling species are longer lived than spermless hermaphrodites. For details on lifespan statistics and raw lifespan data see Supplemental Table 2 and 3, and Source Data File, respectively. \*\*\*\*  $p < 0.00001$ .

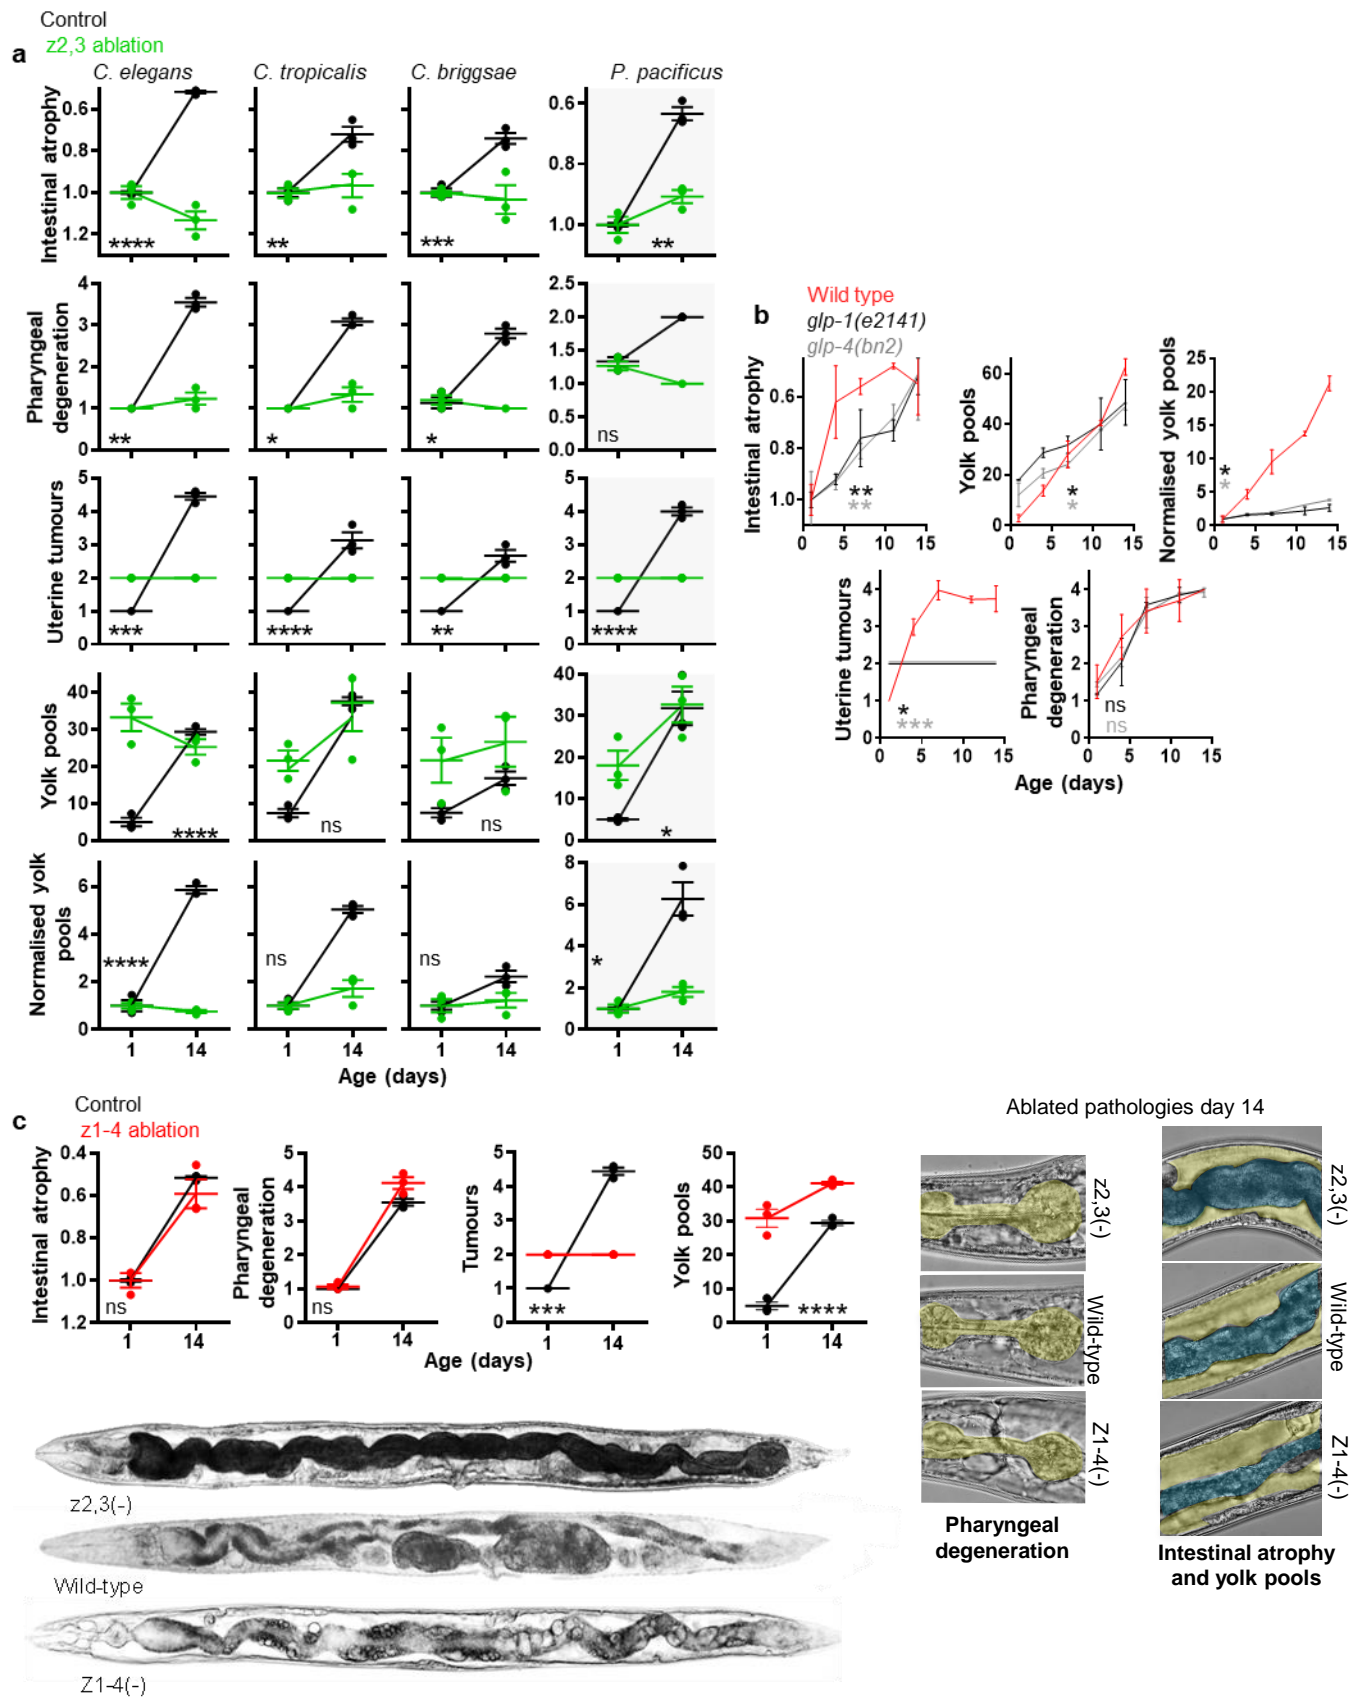

**Supplementary Figure 6. Germline ablation suppresses severe senescent pathologies in hermaphrodites. a** Pathology progression in hermaphrodites is suppressed following z2,3 cell

ablation and germline loss. An exception here is yolk accumulation, which is increased due to the removal of egg laying. **b** Pathology progression in *C. elegans* germline-deficient mutants showing a reduction in most RD-associated pathologies (25°C). Note that suppression of germline development is not complete in these mutants, in contrast to laser ablated animals, which may account for the weaker suppression of RD-associated pathologies. Mean  $\pm$  s.e.m. of 3 trials displayed (n=5-10 worms per trial). **c** An intact somatic gonad is required for germline removal to suppress RD-associated pathology. Top left: pathology progression following z1-4 ablation (i.e. full gonad removal) shows mostly no difference to intact animals. The increase in yolk pool size likely reflects absence of yolk efflux due to absence of egg laying and of a vulva. z2,3(-) and z1-4(-) data were collected together with the same control and are comparable (c.f. *C. elegans* data in b). Mean  $\pm$  s.e.m. of 3 trials displayed (n=5-10 worms per trial). Bottom left: Nomarski images of entire worms, intact (middle) or with germline (top) or whole gonad (bottom) ablated. Note in the germline-ablated animal the dark intestine with no expansion of the gut lumen. The blister-like vesicles in the intestine of whole gonad-ablated worms may be yolk, which is present at high levels due to absence of egg laying and of a vulva. Tumours are absent from ablated animals due to absence of the germline/gonad. The vulva is absent from whole gonad ablated animal, which lack the P cell required for vulval induction. Images have been straightened using the straighten tool in ImageJ. Right: representative Nomarski microscopy images taken for the purpose of scoring pathologies (c.f. Fig. 4b). \*  $p < 0.05$ , \*\*  $p < 0.01$ , \*\*\*  $p < 0.0001$ , \*\*\*\*  $p < 0.00001$  by Cumulative Link Model with gamma link function for pharyngeal degeneration, gonadal degeneration and uterine tumours which are scored ordinals. One-way ANCOVA with score normalised to d1 to determine change in percentage of intestinal mass, and one-way ANCOVA with no normalisation for yolk pools.

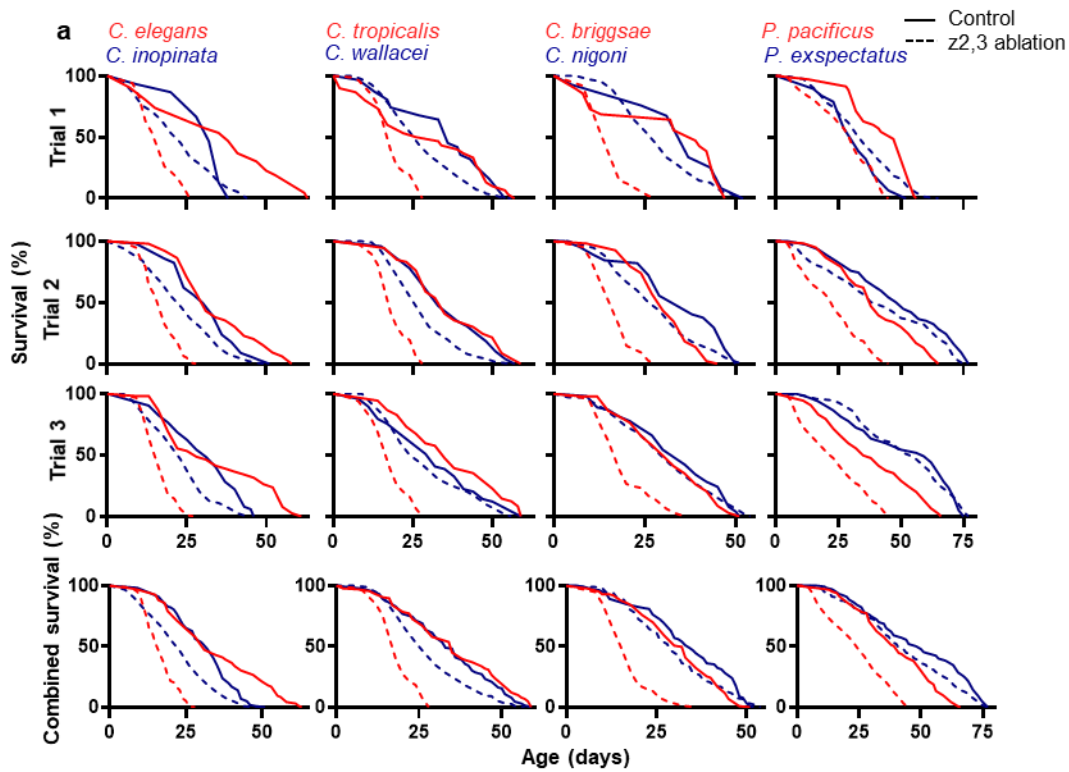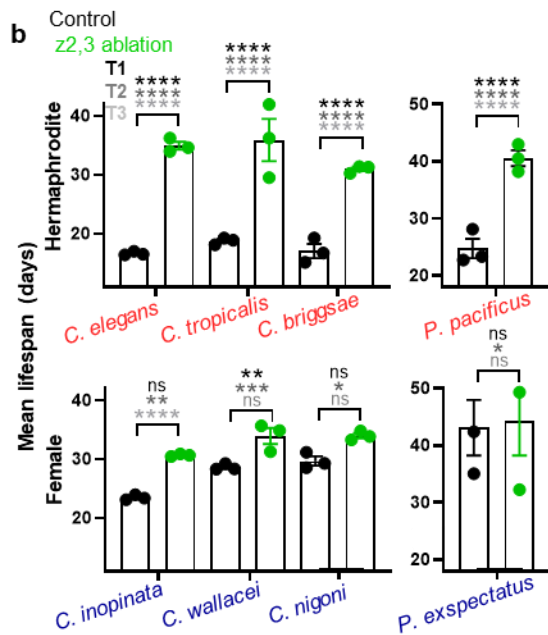

**Supplementary Figure 7. Germline ablation greatly extends lifespan in hermaphrodites but not females.** **a, b** Combined data and individual trial data for lifespans of sibling species after z2,3 ablation. Large effects are seen only in hermaphrodites. Log rank tests for individual trials. Mean  $\pm$  s.e.m. of 3 trials displayed. \*  $p < 0.05$ , \*\*  $p < 0.01$ , \*\*\*  $p < 0.0001$ , \*\*\*\*  $p < 0.00001$ . For details of statistics and raw lifespan data see Supplemental Table 4 and Source Data File, respectively.

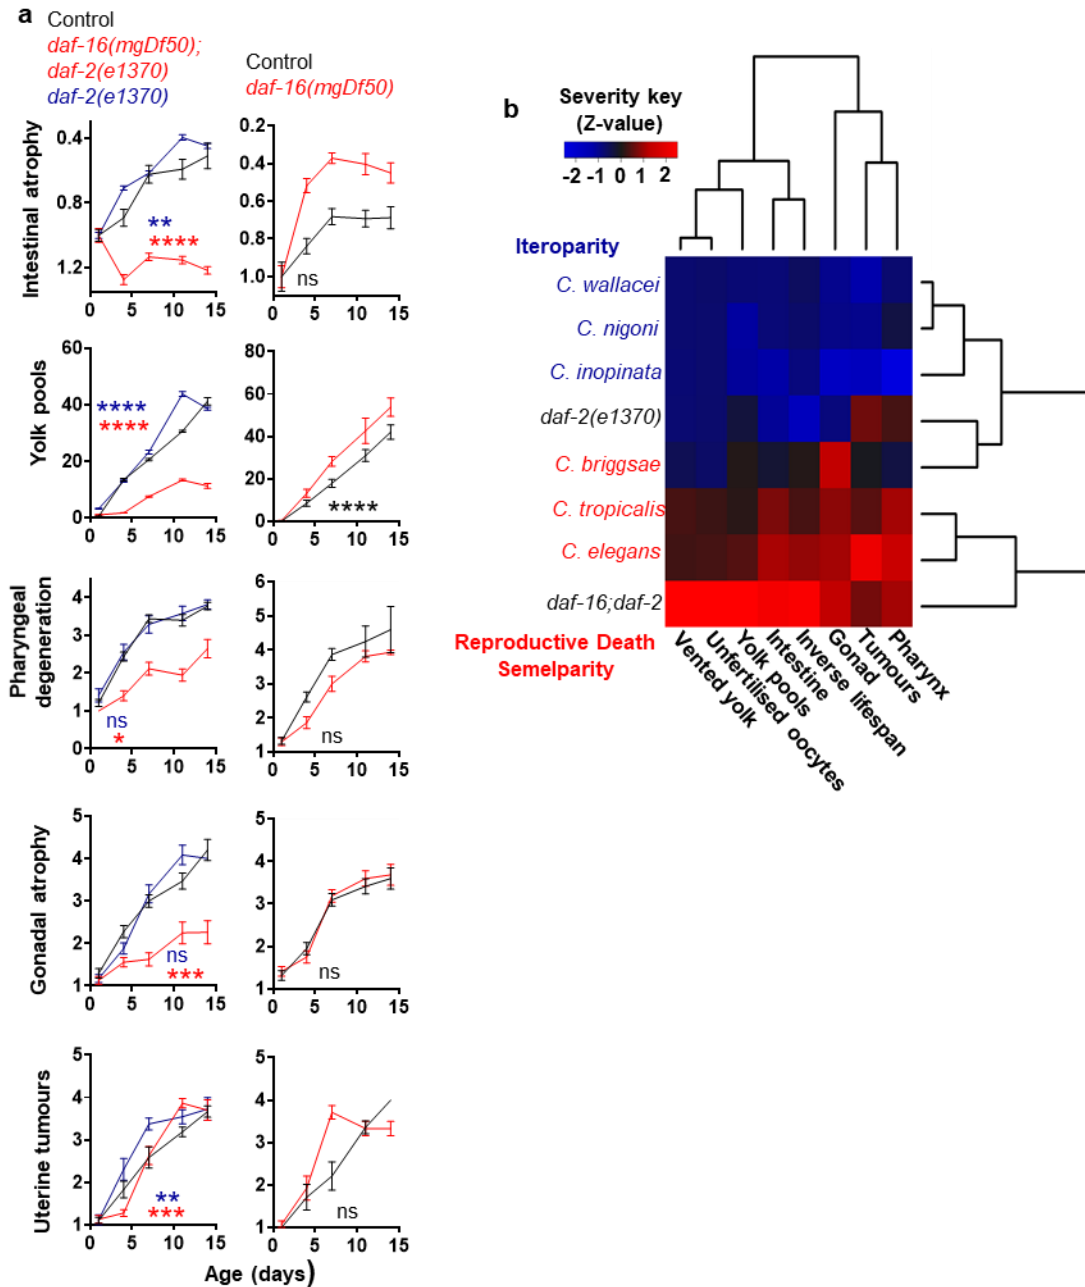

**Supplementary Figure 8. Putative reproductive death is promoted by insulin/IGF-1 signalling (IIS).** **a** Pathology progression is suppressed in *daf-2(e1370)* mutants, and this is *daf-16* dependant. Mean  $\pm$  s.e.m. of 3 trials displayed. \*  $p < 0.05$ , \*\*  $p < 0.01$ , \*\*\*  $p < 0.0001$ , \*\*\*\*  $p < 0.00001$  by Cumulative Link Model with gamma link function for pharyngeal degeneration, gonadal degeneration and uterine tumours which are scored ordinals. One-way ANCOVA with score normalised to d1 to determine change in percentage of intestinal mass, and one-way ANCOVA with no normalisation for yolk pools. **b** Lifespan, putative reproductive death-associated pathologies and yolk venting and unfertilised oocyte venting follow a continuum with *daf-2* behaving like unmated females and *daf-16; daf-2* mutants like unmated hermaphrodites. Heat map comparing differences in pathology progression, lifespan, yolk and oocyte venting across species



and treatments by transforming the calculated gradients of pathology progression into Z-scores. Hierarchical clustering based on pair-wise Euclidean distances was used to cluster pathologies and species/treatments according to similarity. Sources: Mutant yolk venting and oocyte data: (ref. 5); mutant lifespan data: (ref. 6).



| Antibiotic and control 20 °C    |   | Number |          | Lifespan (days) |        | % change treatment | % change ♀ vs ♂ | Log rank          | Cox PH Prob>ChiSq |
|---------------------------------|---|--------|----------|-----------------|--------|--------------------|-----------------|-------------------|-------------------|
|                                 |   | death  | censored | mean            | median |                    |                 |                   |                   |
| <i>C. elegans</i> antibiotic    | C | 219    | 27       | 20.14           | 20.00  | 6.08               | 49.92           | ♀T vs ♀ 0.0049    | <.0001            |
|                                 | 1 | 55     | 9        | 19.93           | 19.00  | 5.75               | 50.82           | ♀T vs ♀ 0.8516    | <.0001            |
|                                 | 2 | 92     | 5        | 20.92           | 22.00  | 10.34              | 49.12           | ♀T vs ♀ 0.0012    | <.0001            |
| <i>C. elegans</i> control       | 3 | 72     | 13       | 19.25           | 20.00  | 1.22               | 49.75           | ♀T vs ♀ 0.1069    | 0.0087            |
|                                 | C | 216    | 31       | 18.99           | 19.00  |                    | 6.79            | ♂ vs ♀ 0.0057     |                   |
|                                 | 1 | 112    | 7        | 18.85           | 18.00  |                    | 12.22           | ♂ vs ♀ 0.1287     |                   |
| <i>C. inopinata</i> antibiotic  | 2 | 54     | 11       | 18.96           | 19.00  |                    | 2.26            | ♂ vs ♀ 0.1192     |                   |
|                                 | 3 | 50     | 13       | 19.02           | 19.00  |                    | 6.25            | ♂ vs ♀ 0.0491     |                   |
|                                 | C | 172    | 111      | 30.20           | 31.00  | 48.92              |                 | ♀T vs ♀ < 0.0001  |                   |
| <i>C. inopinata</i> control     | 1 | 51     | 39       | 30.06           | 31.00  | 42.12              |                 | ♀T vs ♀ < 0.0001  |                   |
|                                 | 2 | 71     | 9        | 31.20           | 33.00  | 60.89              |                 | ♀T vs ♀ < 0.0001  |                   |
|                                 | 3 | 50     | 63       | 28.83           | 29.00  | 42.65              |                 | ♀T vs ♀ < 0.0001  |                   |
| <i>C. tropicalis</i> antibiotic | C | 130    | 96       | 20.28           | 20.00  |                    |                 | ♀T vs ♀T < 0.0001 |                   |
|                                 | 1 | 41     | 32       | 21.15           | 24.00  |                    |                 | ♀T vs ♀T < 0.0001 |                   |
|                                 | 2 | 43     | 32       | 19.39           | 19.00  |                    |                 | ♀T vs ♀T < 0.0001 |                   |
| <i>C. tropicalis</i> control    | 3 | 46     | 32       | 20.21           | 21.00  |                    |                 | ♀T vs ♀T < 0.0001 |                   |
|                                 | C | 264    | 22       | 22.55           | 23.00  | 15.71              | 24.75           | ♀T vs ♀ < 0.0001  | <.0001            |
|                                 | 1 | 95     | 10       | 24.28           | 23.00  | 23.20              | 18.34           | ♀T vs ♀ 0.0003    | 0.0559            |
| <i>C. wallacei</i> antibiotic   | 2 | 91     | 5        | 23.17           | 25.00  | 35.46              | 23.73           | ♀T vs ♀ < 0.0001  | <.0001            |
|                                 | 3 | 78     | 7        | 19.71           | 23.00  | -5.72              | 36.14           | ♀T vs ♀ 0.4462    | 0.0226            |
|                                 | C | 162    | 43       | 19.49           | 21.00  |                    | 39.54           | ♂ vs ♀ < 0.0001   |                   |
| <i>C. wallacei</i> control      | 1 | 78     | 7        | 19.71           | 23.00  |                    | 33.97           | ♂ vs ♀ < 0.0001   |                   |
|                                 | 2 | 44     | 16       | 17.11           | 18.00  |                    | 61.59           | ♂ vs ♀ < 0.0001   |                   |
|                                 | 3 | 40     | 20       | 20.90           | 23.00  |                    | 32.19           | ♂ vs ♀ < 0.0001   |                   |
| <i>C. briggsae</i> antibiotic   | C | 230    | 72       | 28.13           | 27.00  | 3.44               |                 | ♀T vs ♀ 0.1461    |                   |
|                                 | 1 | 82     | 25       | 28.73           | 28.00  | 8.82               |                 | ♀T vs ♀ 0.6742    |                   |
|                                 | 2 | 78     | 22       | 28.67           | 29.00  | 3.72               |                 | ♀T vs ♀ 0.7144    |                   |
| <i>C. briggsae</i> control      | 3 | 70     | 25       | 26.83           | 27.00  | -2.91              |                 | ♀T vs ♀ 0.0038    |                   |
|                                 | C | 240    | 49       | 27.19           | 27.00  |                    |                 | ♀T vs ♀T < 0.0001 |                   |
|                                 | 1 | 87     | 10       | 26.40           | 27.00  |                    |                 | ♀T vs ♀T 0.0006   |                   |
| <i>C. nigoni</i> antibiotic     | 2 | 77     | 20       | 27.64           | 32.00  |                    |                 | ♀T vs ♀T 0.0010   |                   |
|                                 | 3 | 76     | 19       | 27.63           | 32.00  |                    |                 | ♀T vs ♀T < 0.0001 |                   |
|                                 | C | 273    | 29       | 23.91           | 25.00  | 20.33              | 20.52           | ♀T vs ♀ 0.0049    | 0.0165            |
| <i>C. nigoni</i> control        | 1 | 107    | 9        | 23.44           | 24.00  | 18.53              | 18.92           | ♀T vs ♀ 0.0007    | 0.0056            |
|                                 | 2 | 86     | 6        | 23.43           | 25.00  | 9.88               | 28.01           | ♀T vs ♀ 0.1113    | 0.8878            |
|                                 | 3 | 80     | 14       | 25.07           | 25.00  | 28.06              | 16.33           | ♀T vs ♀ 0.0002    | 0.629             |
| <i>P. pacificus</i> antibiotic  | C | 190    | 34       | 19.87           | 20.00  |                    | 35.53           | ♂ vs ♀ < 0.0001   |                   |
|                                 | 1 | 96     | 20       | 19.78           | 24.00  |                    | 40.80           | ♂ vs ♀ < 0.0001   |                   |
|                                 | 2 | 40     | 14       | 21.32           | 19.00  |                    | 32.56           | ♂ vs ♀ 0.0023     |                   |
| <i>P. pacificus</i> control     | 3 | 54     | 0        | 19.57           | 19.00  |                    | 21.02           | ♂ vs ♀ 0.0165     |                   |
|                                 | C | 268    | 49       | 28.82           | 29.00  | 7.00               |                 | ♀T vs ♀ 0.228     |                   |
|                                 | 1 | 116    | 10       | 27.87           | 28.00  | 0.11               |                 | ♀T vs ♀ 0.5663    |                   |
| <i>P. expectatus</i> antibiotic | 2 | 74     | 21       | 29.99           | 29.00  | 6.11               |                 | ♀T vs ♀ 0.4993    |                   |
|                                 | 3 | 78     | 18       | 29.16           | 225.00 | 23.10              |                 | ♀T vs ♀ < 0.0001  |                   |
|                                 | C | 227    | 46       | 26.93           | 25.00  |                    |                 | ♀T vs ♀T < 0.0001 |                   |
| <i>P. expectatus</i> control    | 1 | 90     | 11       | 27.84           | 28.00  |                    |                 | ♀T vs ♀T 0.0004   |                   |
|                                 | 2 | 76     | 21       | 28.26           | 28.00  |                    |                 | ♀T vs ♀T < 0.0001 |                   |
|                                 | 3 | 61     | 14       | 23.69           | 23.00  |                    |                 | ♀T vs ♀T 0.0582   |                   |
| <i>P. pacificus</i> antibiotic  | C | 232    | 26       | 23.86           | 27.00  | 18.71              | 68.22           | ♀T vs ♀ < 0.0001  | <.0001            |
|                                 | 1 | 92     | 7        | 20.93           | 19.00  | 9.12               | 95.85           | ♀T vs ♀ 0.1019    | 0.7063            |
|                                 | 2 | 68     | 6        | 27.12           | 27.00  | 40.36              | 43.54           | ♀T vs ♀ < 0.0001  | <.0001            |
| <i>P. pacificus</i> control     | 3 | 72     | 13       | 24.59           | 27.00  | 17.48              | 74.23           | ♀T vs ♀ 0.0674    | 0.018             |
|                                 | C | 274    | 65       | 20.10           | 20.00  |                    | 120.37          | ♂ vs ♀ < 0.0001   |                   |
|                                 | 1 | 93     | 12       | 19.18           | 20.00  |                    | 111.05          | ♂ vs ♀ < 0.0001   |                   |
| <i>P. expectatus</i> antibiotic | 2 | 79     | 41       | 19.32           | 21.00  |                    | 126.81          | ♂ vs ♀ < 0.0001   |                   |
|                                 | 3 | 102    | 12       | 20.93           | 20.00  |                    | 119.88          | ♂ vs ♀ < 0.0001   |                   |
|                                 | C | 271    | 46       | 40.14           | 41.00  | -9.38              |                 | ♀T vs ♀ 0.0111    |                   |
| <i>P. expectatus</i> control    | 1 | 110    | 11       | 40.99           | 42.00  | 1.26               |                 | ♀T vs ♀ 0.5208    |                   |
|                                 | 2 | 81     | 11       | 38.92           | 38.00  | -11.17             |                 | ♀T vs ♀ 0.1355    |                   |
|                                 | 3 | 105    | 24       | 42.85           | 45.00  | -6.91              |                 | ♀T vs ♀ 0.0017    |                   |
| <i>P. expectatus</i> control    | C | 73     | 58       | 44.29           | 53.00  |                    |                 | ♀T vs ♀T < 0.0001 |                   |
|                                 | 1 | 21     | 11       | 40.48           | 43.00  |                    |                 | ♀T vs ♀T < 0.0001 |                   |
|                                 | 2 | 29     | 44       | 43.82           | 43.00  |                    |                 | ♀T vs ♀T < 0.0001 |                   |
|                                 | 3 | 22     | 3        | 46.02           | 53.00  |                    |                 | ♀T vs ♀T < 0.0001 |                   |

  

| Antibiotic and control 25 °C |   | Number |          | Lifespan (days) |        | % change ♀ vs ♂ | Log rank          | Cox PH Prob>ChiSq |
|------------------------------|---|--------|----------|-----------------|--------|-----------------|-------------------|-------------------|
|                              |   | death  | censored | mean            | median |                 |                   |                   |
| <i>C. elegans</i>            | C | 268    | 66       | 15.57           | 15.00  | -25.76          | ♀T vs ♀T < 0.0001 | 0.0407            |
|                              | 1 | 110    | 32       | 15.09           | 15.00  | -33.72          | ♀T vs ♀T < 0.0001 |                   |
|                              | 2 | 83     | 22       | 15.30           | 15.00  | -27.64          | ♀T vs ♀T < 0.0001 |                   |
| <i>C. inopinata</i>          | 3 | 75     | 12       | 16.53           | 16.00  | -13.35          | ♀T vs ♀T 0.0198   |                   |
|                              | C | 176    | 60       | 20.97           | 22.00  |                 |                   |                   |
|                              | 1 | 75     | 13       | 22.76           | 22.00  |                 |                   |                   |
| <i>C. inopinata</i>          | 2 | 27     | 27       | 21.15           | 22.00  |                 |                   |                   |
|                              | 3 | 74     | 20       | 19.08           | 21.00  |                 |                   |                   |

  

| UV irradiated bacteria 20 °C |   | Number |          | Lifespan (days) |        | % change ♀ vs ♂ | Log rank          | Cox PH Prob>ChiSq |
|------------------------------|---|--------|----------|-----------------|--------|-----------------|-------------------|-------------------|
|                              |   | death  | censored | mean            | median |                 |                   |                   |
| <i>C. elegans</i>            | C | 46     | 27       | 25.65           | 28.00  | -35.14          | ♀T vs ♀T < 0.0001 | <.0001            |
|                              | 1 | 24     | 18       | 27.54           | 27.00  | -31.01          | ♀T vs ♀T < 0.0001 |                   |
|                              | 2 | 22     | 9        | 23.77           | 29.00  | -40.75          | ♀T vs ♀T < 0.0001 |                   |
| <i>C. inopinata</i>          | C | 43     | 27       | 39.55           | 35.00  |                 |                   |                   |
|                              | 1 | 30     | 20       | 39.92           | 38.00  |                 |                   |                   |
|                              | 2 | 13     | 7        | 40.12           | 33.00  |                 |                   |                   |

**Supplementary Table 1. Female sibling species are longer lived than hermaphrodites when bacterial pathogenicity is excluded.** C is combined data from all trials, and T is treatment (antibiotic carbenicillin vs control).

| Mated vs control 20 °C        |   | Number |          | lifespan(days) |        | % change treatment | % change ♀ vs ♂ | Log rank          | Cox PH Prob>ChiSq |
|-------------------------------|---|--------|----------|----------------|--------|--------------------|-----------------|-------------------|-------------------|
|                               |   | death  | censored | mean           | median |                    |                 |                   |                   |
| <i>C. elegans</i> mated       | C | 123    | 24       | 15.01          | 12.00  | -20.72             | 5.58            | ♂T vs ♀ 0.0004    | 0.8463            |
|                               | 1 | 41     | 8        | 15.62          | 16.00  | -17.14             | -5.89           | ♂T vs ♀ 0.0017    | 0.5995            |
|                               | 2 | 82     | 16       | 14.91          | 12.00  | -21.36             | 21.82           | ♂T vs ♀ 0.0194    | 0.1326            |
| <i>C. elegans</i> control     | C | 166    | 18       | 18.93          | 18.00  |                    | 7.19            | ♂ vs ♀ 0.0455     |                   |
|                               | 1 | 112    | 7        | 18.85          | 18.00  |                    | 12.22           | ♂ vs ♀ 0.1287     |                   |
|                               | 2 | 54     | 11       | 18.96          | 19.00  |                    | 2.26            | ♂ vs ♀ 0.1192     |                   |
| <i>C. inopinata</i> mated     | C | 105    | 16       | 15.84          | 14.00  | -21.91             |                 | ♀T vs ♀ 0.0213    |                   |
|                               | 1 | 74     | 13       | 14.70          | 18.00  | -30.51             |                 | ♀T vs ♀ 0.0012    |                   |
|                               | 2 | 31     | 3        | 18.17          | 14.00  | -6.31              |                 | ♀T vs ♀ 0.6203    |                   |
| <i>C. inopinata</i> control   | C | 84     | 64       | 20.29          | 19.00  |                    |                 | ♂T vs ♀T 0.1954   |                   |
|                               | 1 | 41     | 32       | 21.15          | 24.00  |                    |                 | ♂T vs ♀T 0.6610   |                   |
|                               | 2 | 43     | 32       | 19.39          | 19.00  |                    |                 | ♂T vs ♀T 0.1117   |                   |
| <i>C. tropicalis</i> mated    | C | 144    | 7        | 18.07          | 16.00  | -3.54              | 10.64           | ♂T vs ♀ 0.7607    | <.0001            |
|                               | 1 | 83     | 7        | 19.31          | 16.00  | -2.00              | -2.33           | ♂T vs ♀ 0.8952    | 0.0069            |
|                               | 2 | 61     | 0        | 16.20          | 16.00  | -4.12              | 13.16           | ♂T vs ♀ 0.9253    | 0.0017            |
| <i>C. tropicalis</i> control  | C | 123    | 22       | 18.73          | 18.00  |                    | 44.13           | ♂ vs ♀ < 0.0001   |                   |
|                               | 1 | 78     | 7        | 19.71          | 23.00  |                    | 33.97           | ♂ vs ♀ < 0.0001   |                   |
|                               | 2 | 45     | 15       | 16.89          | 18.00  |                    | 63.63           | ♂ vs ♀ < 0.0001   |                   |
| <i>C. wallacei</i> mated      | C | 83     | 55       | 19.99          | 19.00  | -25.96             |                 | ♀T vs ♀ < 0.0001  |                   |
|                               | 1 | 30     | 21       | 18.86          | 21.00  | -28.56             |                 | ♀T vs ♀ 0.0048    |                   |
|                               | 2 | 53     | 34       | 18.33          | 19.00  | -33.69             |                 | ♀T vs ♀ < 0.0001  |                   |
| <i>C. wallacei</i> control    | C | 164    | 30       | 27.00          | 27.00  |                    |                 | ♂T vs ♀T 0.0441   |                   |
|                               | 1 | 87     | 10       | 26.40          | 27.00  |                    |                 | ♂T vs ♀T 0.5469   |                   |
|                               | 2 | 77     | 20       | 27.64          | 32.00  |                    |                 | ♂T vs ♀T 0.0185   |                   |
| <i>C. briggsae</i> mated      | C | 180    | 1        | 16.62          | 16.00  | -15.34             | -12.04          | ♂T vs ♀ < 0.0001  | <.0001            |
|                               | 1 | 123    | 0        | 16.78          | 16.00  | -15.14             | -6.17           | ♂T vs ♀ 0.0004    | <.0001            |
|                               | 2 | 57     | 1        | 16.27          | 16.00  | -16.90             | -9.41           | ♂T vs ♀ 0.0159    | 0.1378            |
| <i>C. briggsae</i> control    | C | 150    | 20       | 19.63          | 20.00  |                    | 33.53           | ♂ vs ♀ < 0.0001   |                   |
|                               | 1 | 96     | 20       | 19.78          | 20.00  |                    | 40.86           | ♂ vs ♀ < 0.0001   |                   |
|                               | 2 | 54     | 0        | 19.57          | 19.00  |                    | 21.02           | ♂ vs ♀ 0.0165     |                   |
| <i>C. nigoni</i> mated        | C | 161    | 66       | 14.62          | 12.00  | -44.23             |                 | ♀T vs ♀ < 0.0001  |                   |
|                               | 1 | 43     | 4        | 15.74          | 14.00  | -43.48             |                 | ♀T vs ♀ < 0.0001  |                   |
|                               | 2 | 118    | 62       | 14.74          | 12.00  | -37.80             |                 | ♀T vs ♀ < 0.0001  |                   |
| <i>C. nigoni</i> control      | C | 151    | 26       | 26.22          | 25.00  |                    |                 | ♂T vs ♀T 0.0746   |                   |
|                               | 1 | 90     | 12       | 27.86          | 28.00  |                    |                 | ♂T vs ♀T 0.1812   |                   |
|                               | 2 | 61     | 14       | 23.69          | 23.00  |                    |                 | ♂T vs ♀T 0.1748   |                   |
| <i>P. pacificus</i> mated     | C | 132    | 50       | 19.68          | 19.00  | 0.99               | 33.85           | ♂T vs ♀ 0.2286    | <.0001            |
|                               | 1 | 59     | 18       | 19.30          | 19.00  | 0.62               | 37.82           | ♂T vs ♀ 0.8972    | 0.0027            |
|                               | 2 | 73     | 32       | 19.95          | 19.00  | 3.27               | 30.31           | ♂T vs ♀ 0.5063    | <.0001            |
| <i>P. pacificus</i> control   | C | 172    | 53       | 19.48          | 21.00  |                    | 120.08          | ♂ vs ♀ < 0.0001   |                   |
|                               | 1 | 93     | 12       | 19.18          | 20.00  |                    | 111.05          | ♂ vs ♀ < 0.0001   |                   |
|                               | 2 | 79     | 41       | 19.32          | 21.00  |                    | 126.81          | ♂ vs ♀ < 0.0001   |                   |
| <i>P. exspectatus</i> mated   | C | 82     | 32       | 26.34          | 30.00  | -38.58             |                 | ♀T vs ♀ < 0.0001  |                   |
|                               | 1 | 39     | 16       | 26.60          | 30.00  | -34.29             |                 | ♀T vs ♀ 0.0019    |                   |
|                               | 2 | 43     | 16       | 26.00          | 30.00  | -40.67             |                 | ♀T vs ♀ < 0.0001  |                   |
| <i>P. exspectatus</i> control | C | 50     | 55       | 42.88          | 43.00  |                    |                 | ♂T vs ♀T < 0.0001 |                   |
|                               | 1 | 21     | 11       | 40.48          | 43.00  |                    |                 | ♂T vs ♀T < 0.0001 |                   |
|                               | 2 | 29     | 44       | 43.82          | 43.00  |                    |                 | ♂T vs ♀T 0.0107   |                   |

**Supplementary Table 2. Comparison of hermaphrodite and female sibling species lifespans following mating.** C is combined data from all trials, and T is treatment (mated or unmated).

| Spermless<br>(25°C)                     | Number | censore |     | lifespans(days) |       | %change<br>vs ♀ | %change<br>vs ♂ | Logrank<br>T vs ♀ | Logrank<br>T vs ♂ |
|-----------------------------------------|--------|---------|-----|-----------------|-------|-----------------|-----------------|-------------------|-------------------|
|                                         |        | death   | d   | mean            | media |                 |                 |                   |                   |
| <i>C. elegans</i>                       | C      | 136     | 50  | 17.65           | 17.00 |                 |                 |                   |                   |
|                                         | 1      | 48      | 14  | 17.54           | 17.00 |                 | -15.87          |                   | <0.0001           |
|                                         | 2      | 40      | 22  | 18.91           | 20.00 |                 | -16.37          |                   | <0.0001           |
|                                         | 3      | 48      | 14  | 16.56           | 17.00 |                 | -9.84           |                   | <0.0001           |
| <i>C. elegans fem-3</i>                 | C      | 215     | 6   | 17.73           | 17.00 | 0.47            | -21.04          | 0.6434            | <0.0001           |
|                                         | 1      | 74      | 3   | 18.85           | 20.00 | 6.81            | -15.48          | 0.0054            | <0.0001           |
|                                         | 2      | 70      | 2   | 18.96           | 17.00 | 7.45            | -10.15          | 0.0056            | <0.0001           |
|                                         | 3      | 71      | 1   | 19.02           | 17.00 | 7.78            | -9.61           | 0.5030            | <0.0001           |
| <i>C. elegans fog-2</i>                 | C      | 191     | 20  | 20.23           | 20.00 | 14.63           | -9.33           | <0.0001           | 0.0002            |
|                                         | 1      | 56      | 11  | 17.92           | 17.00 | 1.55            | -3.56           | 0.3502            | <0.0001           |
|                                         | 2      | 67      | 5   | 20.76           | 20.00 | 17.65           | -14.57          | 0.0026            | 0.0213            |
|                                         | 3      | 68      | 4   | 21.66           | 20.00 | 22.75           | -1.03           | <0.0001           | 0.9243            |
| <i>C. inopinata</i>                     | C      | 160     | 67  | 20.98           | 20.00 | 18.87           | 3.27            | <0.0001           |                   |
|                                         | 1      | 78      | 3   | 21.55           | 23.00 | 22.14           |                 | <0.0001           |                   |
|                                         | 2      | 31      | 47  | 21.47           | 20.00 | 21.66           |                 | <0.0001           |                   |
|                                         | 3      | 51      | 17  | 18.12           | 17.00 | 2.66            |                 | <0.0001           |                   |
| <i>C. tropicalis</i>                    | C      | 158     | 51  | 18.64           | 18.00 |                 | -9.09           |                   | 0.0002            |
|                                         | 1      | 54      | 17  | 18.92           | 18.00 |                 | -7.70           |                   | 0.0032            |
|                                         | 2      | 49      | 16  | 18.73           | 18.00 |                 | -8.64           |                   | 0.5954            |
|                                         | 3      | 55      | 17  | 18.26           | 18.00 |                 | -10.94          |                   | 0.0547            |
| <i>C. tropicalis<br/>Ctr-fem-3 RNAi</i> | C      | 151     | 30  | 11.22           | 11.00 | -39.79          | -45.27          | <0.0001           | <0.0001           |
|                                         | 1      | 50      | 11  | 11.11           | 11.00 | -40.42          | -45.83          | <0.0001           | <0.0001           |
|                                         | 2      | 52      | 13  | 11.49           | 11.00 | -38.33          | -43.94          | <0.0001           | <0.0001           |
|                                         | 3      | 49      | 6   | 11.05           | 11.00 | -40.70          | -46.09          | <0.0001           | <0.0001           |
| <i>C. wallacei</i>                      | C      | 155     | 78  | 20.50           | 20.00 | 10.00           |                 | 0.0002            |                   |
|                                         | 1      | 59      | 17  | 21.16           | 22.00 | 13.52           |                 | 0.0032            |                   |
|                                         | 2      | 45      | 32  | 20.25           | 20.00 | 8.67            |                 | 0.5954            |                   |
|                                         | 3      | 51      | 29  | 20.05           | 19.00 | 7.59            |                 | 0.0547            |                   |
| <i>C. briggsae</i>                      | C      | 62      | 178 | 19.56           | 18.00 |                 | -19.98          |                   | <0.0001           |
|                                         | 1      | 36      | 66  | 16.17           | 18.00 |                 | -33.82          |                   | 0.0391            |
|                                         | 2      | 38      | 56  | 15.06           | 18.00 |                 | -38.36          |                   | <0.0001           |
|                                         | 3      | 38      | 56  | 20.93           | 23.00 |                 | -14.35          |                   | 0.0102            |
| <i>C. briggsae<br/>she-1(v49)</i>       | C      | 100     | 105 | 22.03           | 23.00 | 12.64           | -9.86           | 0.0001            | 0.0038            |
|                                         | 1      | 34      | 32  | 19.08           | 20.00 | -2.42           | -21.91          | 0.3707            | 0.0064            |
|                                         | 2      | 34      | 40  | 23.02           | 23.00 | 17.72           | -5.79           | <0.0001           | 0.6090            |
|                                         | 3      | 32      | 33  | 24.02           | 23.00 | 22.82           | -1.72           | 0.2499            | 0.3454            |
| <i>C. briggsae<br/>she-1(v35)</i>       | C      | 98      | 124 | 22.59           | 23.00 | 15.53           | -7.55           | <0.0001           | 0.1564            |
|                                         | 1      | 21      | 51  | 24.63           | 25.00 | 25.94           | 0.78            | 0.0004            | 0.5979            |
|                                         | 2      | 39      | 38  | 21.64           | 23.00 | 10.65           | -11.45          | <0.0001           | 0.0054            |
|                                         | 3      | 38      | 35  | 22.47           | 23.00 | 14.92           | -8.03           | 0.8084            | 0.0003            |
| <i>C. nigoni</i>                        | C      | 180     | 38  | 24.44           | 25.00 | 24.96           |                 | <0.0001           |                   |
|                                         | 1      | 61      | 12  | 22.10           | 25.00 | 13.02           |                 | 0.0391            |                   |
|                                         | 2      | 63      | 16  | 25.30           | 25.00 | 29.37           |                 | <0.0001           |                   |
|                                         | 3      | 56      | 10  | 25.90           | 25.00 | 32.44           |                 | 0.0102            |                   |

**Supplementary Table 3. Comparison of lifespans of feminised and wild-type hermaphrodites, and female sibling species.** C is combined data from all trials, and T is treatment (sperm knockdown via mutation or RNAi; comparisons between hermaphrodites and female sibling species are also added under T for simplicity).

| z2,3, ablation<br>20 °C          |   | Number |          | Lifespan (days) |        | % change<br>treatment | % change<br>♀ vs ♂ | Log rank          | Cox PH<br>Prob>ChiSq |
|----------------------------------|---|--------|----------|-----------------|--------|-----------------------|--------------------|-------------------|----------------------|
|                                  |   | death  | censored | mean            | median |                       |                    |                   |                      |
| <i>C. elegans</i><br>ablated     | C | 116    | 22       | 34.71           | 31.00  | 107.89                | -11.83             | ♂T vs ♀ < 0.0001  | <.0001               |
|                                  | 1 | 28     | 4        | 36.23           | 38.00  | 120.18                | -15.35             | ♂T vs ♀ < 0.0001  | <.0001               |
|                                  | 2 | 43     | 9        | 34.65           | 31.00  | 103.14                | -10.76             | ♂T vs ♀ < 0.0001  | <.0001               |
|                                  | 3 | 45     | 9        | 33.99           | 28.00  | 105.28                | -10.34             | ♂T vs ♀ < 0.0001  | <.0001               |
| <i>C. elegans</i><br>control     | C | 282    | 18       | 16.70           | 18.00  |                       | 40.63              | ♂ vs ♀ < 0.0001   |                      |
|                                  | 1 | 100    | 1        | 16.45           | 18.00  |                       | 40.56              | ♂ vs ♀ < 0.0001   |                      |
|                                  | 2 | 96     | 3        | 17.06           | 18.00  |                       | 40.60              | ♂ vs ♀ < 0.0001   |                      |
|                                  | 3 | 86     | 14       | 16.56           | 15.00  |                       | 41.16              | ♂ vs ♀ < 0.0001   |                      |
| <i>C. inopinata</i><br>ablated   | C | 110    | 14       | 30.61           | 32.00  | 30.34                 |                    | ♀T vs ♀ < 0.0001  |                      |
|                                  | 1 | 15     | 0        | 30.67           | 32.00  | 32.60                 |                    | ♀T vs ♀ 0.1410    |                      |
|                                  | 2 | 45     | 12       | 30.92           | 30.00  | 28.94                 |                    | ♀T vs ♀ 0.0011    |                      |
|                                  | 3 | 50     | 2        | 30.48           | 31.00  | 30.38                 |                    | ♀T vs ♀ < 0.0001  |                      |
| <i>C. inopinata</i><br>control   | C | 383    | 37       | 23.48           | 23.00  |                       |                    | ♂T vs ♀T 0.0003   |                      |
|                                  | 1 | 119    | 16       | 23.13           | 23.00  |                       |                    | ♂T vs ♀T 0.0202   |                      |
|                                  | 2 | 119    | 6        | 23.98           | 23.00  |                       |                    | ♂T vs ♀T 0.0436   |                      |
|                                  | 3 | 145    | 15       | 23.38           | 23.00  |                       |                    | ♂T vs ♀T 0.0242   |                      |
| <i>C. tropicalis</i><br>ablated  | C | 118    | 20       | 35.21           | 35.00  | 87.21                 | -3.92              | ♂T vs ♀ < 0.0001  | <.0001               |
|                                  | 1 | 30     | 0        | 29.53           | 29.50  | 55.97                 | 18.07              | ♂T vs ♀ < 0.0001  | 0.0027               |
|                                  | 2 | 38     | 16       | 36.26           | 35.00  | 87.72                 | -1.61              | ♂T vs ♀ < 0.0001  | <.0001               |
|                                  | 3 | 34     | 20       | 41.94           | 47.00  | 130.90                | -25.45             | ♂T vs ♀ < 0.0001  | <.0001               |
| <i>C. tropicalis</i><br>control  | C | 213    | 41       | 18.81           | 18.00  |                       | 52.46              | ♂ vs ♀ < 0.0001   |                      |
|                                  | 1 | 70     | 14       | 18.93           | 18.00  |                       | 49.69              | ♂ vs ♀ < 0.0001   |                      |
|                                  | 2 | 68     | 21       | 19.32           | 18.00  |                       | 46.77              | ♂ vs ♀ < 0.0001   |                      |
|                                  | 3 | 75     | 6        | 18.16           | 18.00  |                       | 61.10              | ♂ vs ♀ < 0.0001   |                      |
| <i>C. wallacei</i><br>ablated    | C | 129    | 1        | 33.83           | 33.00  | 17.98                 |                    | ♀T vs ♀ < 0.0001  |                      |
|                                  | 1 | 31     | 0        | 34.87           | 36.00  | 23.03                 |                    | ♀T vs ♀ 0.0057    |                      |
|                                  | 2 | 49     | 1        | 35.68           | 33.00  | 25.83                 |                    | ♀T vs ♀ 0.0002    |                      |
|                                  | 3 | 49     | 0        | 31.27           | 32.00  | 6.86                  |                    | ♀T vs ♀ 0.3265    |                      |
| <i>C. wallacei</i><br>control    | C | 386    | 30       | 28.67           | 27.00  |                       |                    | ♂T vs ♀T 0.1631   |                      |
|                                  | 1 | 137    | 15       | 28.34           | 27.00  |                       |                    | ♂T vs ♀T 0.7572   |                      |
|                                  | 2 | 122    | 12       | 28.35           | 27.00  |                       |                    | ♂T vs ♀T 0.7531   |                      |
|                                  | 3 | 127    | 3        | 29.26           | 25.50  |                       |                    | ♂T vs ♀T 0.0801   |                      |
| <i>C. briggsae</i><br>ablated    | C | 110    | 22       | 30.90           | 32.00  | 80.13                 | 8.73               | ♂T vs ♀ < 0.0001  | <.0001               |
|                                  | 1 | 24     | 5        | 31.33           | 39.00  | 106.39                | 11.06              | ♂T vs ♀ < 0.0001  | 0.0001               |
|                                  | 2 | 49     | 5        | 30.26           | 30.00  | 80.64                 | 11.99              | ♂T vs ♀ < 0.0001  | <.0001               |
|                                  | 3 | 37     | 12       | 31.42           | 30.00  | 62.70                 | 5.92               | ♂T vs ♀ < 0.0001  | <.0001               |
| <i>C. briggsae</i><br>control    | C | 264    | 12       | 17.15           | 18.00  |                       | 73.08              | ♂ vs ♀ < 0.0001   |                      |
|                                  | 1 | 88     | 0        | 15.18           | 15.00  |                       | 92.91              | ♂ vs ♀ < 0.0001   |                      |
|                                  | 2 | 82     | 8        | 16.75           | 18.00  |                       | 70.59              | ♂ vs ♀ < 0.0001   |                      |
|                                  | 3 | 94     | 4        | 19.31           | 18.00  |                       | 61.50              | ♂ vs ♀ < 0.0001   |                      |
| <i>C. nigoni</i><br>ablated      | C | 101    | 16       | 33.59           | 34.00  | 13.15                 |                    | ♀T vs ♀ 0.0152    |                      |
|                                  | 1 | 12     | 2        | 34.80           | 37.00  | 18.82                 |                    | ♀T vs ♀ 0.1412    |                      |
|                                  | 2 | 38     | 9        | 33.88           | 35.00  | 18.58                 |                    | ♀T vs ♀ 0.0140    |                      |
|                                  | 3 | 51     | 5        | 33.28           | 33.00  | 6.70                  |                    | ♀T vs ♀ 0.6898    |                      |
| <i>C. nigoni</i><br>control      | C | 371    | 49       | 29.69           | 29.00  |                       |                    | ♂T vs ♀T 0.0061   |                      |
|                                  | 1 | 120    | 20       | 29.29           | 28.00  |                       |                    | ♂T vs ♀T 0.9253   |                      |
|                                  | 2 | 123    | 12       | 28.57           | 29.00  |                       |                    | ♂T vs ♀T 0.0050   |                      |
|                                  | 3 | 128    | 17       | 31.19           | 32.00  |                       |                    | ♂T vs ♀T 0.2840   |                      |
| <i>P. pacificus</i><br>ablated   | C | 138    | 11       | 40.23           | 41.00  | 64.28                 | 20.50              | ♂T vs ♀ < 0.0001  | <.0001               |
|                                  | 1 | 35     | 0        | 43.00           | 47.00  | 52.86                 | -24.98             | ♂T vs ♀ < 0.0001  | <.0001               |
|                                  | 2 | 54     | 6        | 40.49           | 38.00  | 78.34                 | 21.82              | ♂T vs ♀ < 0.0001  | 0.0095               |
|                                  | 3 | 49     | 5        | 38.21           | 35.00  | 63.55                 | 34.00              | ♂T vs ♀ < 0.0001  | <.0001               |
| <i>P. pacificus</i><br>control   | C | 236    | 83       | 24.49           | 25.00  |                       | 76.91              | ♂ vs ♀ < 0.0001   |                      |
|                                  | 1 | 53     | 54       | 28.13           | 31.00  |                       | 24.55              | ♂ vs ♀ 0.0002     |                      |
|                                  | 2 | 90     | 18       | 22.71           | 23.00  |                       | 86.68              | ♂ vs ♀ < 0.0001   |                      |
|                                  | 3 | 93     | 11       | 23.36           | 23.00  |                       | 122.01             | ♂ vs ♀ < 0.0001   |                      |
| <i>P. exspectatus</i><br>ablated | C | 169    | 12       | 48.47           | 50.00  | 11.90                 |                    | ♀T vs ♀ 0.0020    |                      |
|                                  | 1 | 17     | 2        | 32.26           | 33.00  | -7.93                 |                    | ♀T vs ♀ 0.1298    |                      |
|                                  | 2 | 74     | 3        | 49.33           | 51.00  | 16.38                 |                    | ♀T vs ♀ 0.0081    |                      |
|                                  | 3 | 78     | 7        | 51.20           | 59.00  | -1.28                 |                    | ♀T vs ♀ 0.7380    |                      |
| <i>P. exspectatus</i><br>control | C | 367    | 111      | 43.32           | 41.00  |                       |                    | ♂T vs ♀T < 0.0001 |                      |
|                                  | 1 | 125    | 10       | 35.04           | 35.00  |                       |                    | ♂T vs ♀T 0.0002   |                      |
|                                  | 2 | 105    | 50       | 42.39           | 41.00  |                       |                    | ♂T vs ♀T < 0.0001 |                      |
|                                  | 3 | 137    | 51       | 51.87           | 55.00  |                       |                    | ♂T vs ♀T < 0.0001 |                      |

**Supplementary Table 4. Comparison of lifespans of hermaphrodite and female sibling species following germline ablation.** C is combined data from all trials, and T is treatment (z2,3 ablation vs control).

| Species                                        | Type         | Stable ID & gene name                                                                          | Location                             | Target %id | Query %id |
|------------------------------------------------|--------------|------------------------------------------------------------------------------------------------|--------------------------------------|------------|-----------|
| Caenorhabditis brenneri (PRJNA20035)           | Many-to-many | WBGene00141755CBN03030 F-box domain-containing protein [Source: UniProtKB/TrEMBL; acc: G0NR54] | Cbre_Contig144:93,719-94,969:1       | 17.8042    | 18.3486   |
| Caenorhabditis brenneri (PRJNA20035)           | Many-to-many | WBGene00219468CBN32940 (No description)                                                        | Cbre_Contig13:62,548-63,612:-1       | 17.2308    | 17.1254   |
| Caenorhabditis remanei (PRJNA53967)            | 1-to-many    | WBGene00065932CRE15688 F-box domain-containing protein [Source: UniProtKB/TrEMBL; acc: E3N872] | Crem_Contig147:125,909-127,086:-1    | 14.4044    | 15.9021   |
| Caenorhabditis remanei (PRJNA577507 - PX506)   | 1-to-many    | GCK72_021717F-box domain-containing protein [Source: UniProtKB/TrEMBL; acc: A0A6A5GIX5]        | V:20,964,520-20,965,697:-1           | 13.5734    | 14.9847   |
| Caenorhabditis sinica (PRJNA194557)            | 1-to-many    | Csp5_scaffold_00956.g17079 (No description)                                                    | Csp5_scaffold_00956:15,646-18,094:1  | 14.2857    | 17.4312   |
| Caenorhabditis zanzibari (PRJEB12596 - JU2190) | Many-to-many | CSP26.g14665 (No description)                                                                  | CSP26.scaffold01695:21,907-29,411:-1 | 16.7901    | 20.7951   |
| Caenorhabditis zanzibari (PRJEB12596 - JU2190) | Many-to-many | CSP26.g14674 (No description)                                                                  | CSP26.scaffold01695:78,616-81,353:-1 | 15.6566    | 18.9602   |
| Caenorhabditis zanzibari (PRJEB12596 - JU2190) | Many-to-many | CSP26.g15834 (No description)                                                                  | CSP26.scaffold01921:12,710-14,290:-1 | 17.4174    | 17.737    |
| Caenorhabditis zanzibari (PRJEB12596 - JU2190) | Many-to-many | CSP26.g15837 (No description)                                                                  | CSP26.scaffold01921:22,754-24,324:-1 | 15.8568    | 18.9602   |
| Caenorhabditis zanzibari (PRJEB12596 - JU2190) | Many-to-many | CSP26.g15840 (No description)                                                                  | CSP26.scaffold01921:29,231-30,820:-1 | 14.7132    | 18.0428   |
| Caenorhabditis zanzibari (PRJEB12596 - JU2190) | Many-to-many | CSP26.g15842 (No description)                                                                  | CSP26.scaffold01921:33,394-35,889:-1 | 14.6699    | 18.3486   |
| Caenorhabditis zanzibari (PRJEB12596 - JU2190) | Many-to-many | CSP26.g15846 (No description)                                                                  | CSP26.scaffold01921:46,049-48,140:1  | 15.0121    | 18.9602   |
| Caenorhabditis zanzibari (PRJEB12596 - JU2190) | Many-to-many | CSP26.g18235 (No description)                                                                  | CSP26.scaffold02352:1,219-3,859:-1   | 17.7843    | 18.6544   |
| Caenorhabditis zanzibari (PRJEB12596 - JU2190) | Many-to-many | CSP26.g21536 (No description)                                                                  | CSP26.scaffold03017:1,263-2,940:-1   | 17.5127    | 21.1009   |
| Caenorhabditis zanzibari (PRJEB12596 - JU2190) | Many-to-many | CSP26.g8985 (No description)                                                                   | CSP26.scaffold00585:15,224-18,508:-1 | 17.1795    | 20.4893   |

**Supplementary Table 5. Orthologues of *C. elegans fog-2*.** List from Wormbase Parasite Version WBPS17 identify 15 orthologues of *C. elegans fog-2* (Y113G7B.5).

| Species                                            | Type      | Stable ID & gene name                                                                               | Location                                     | Target %id | Query %id |
|----------------------------------------------------|-----------|-----------------------------------------------------------------------------------------------------|----------------------------------------------|------------|-----------|
| Caenorhabditis zanzibari (PRJEB12596 - JU2190)     | 1-to-1    | CSP26.g3 (No description)                                                                           | CSP26.scaffold00001:17,381-22,959:-1         | 33.9713    | 36.5979   |
| Caenorhabditis briggsae (PRJNA10731)               | 1-to-1    | WBGene00000329Cbr-fem-3 Sex-determination protein fem-3 [Source: UniProtKB/Swiss-Prot; acc: Q8I8U6] | IV:4,390,949-4,394,091:-1                    | 34.4743    | 36.3402   |
| Caenorhabditis brenneri (PRJNA20035)               | 1-to-1    | WBGene00143028Cbn-fem-3 (No description)                                                            | Cbre_Contig125:108,075-110,499:-1            | 32.4826    | 36.0829   |
| Caenorhabditis sinica (PRJNA194557)                | 1-to-1    | Csp5_scaffold_00790.g15495 (No description)                                                         | Csp5_scaffold_00790:22,851-25,534:-1         | 34.414     | 35.567    |
| Caenorhabditis tribulationis (PRJEB12608 - JU2818) | 1-to-1    | CSP40.g12744 (No description)                                                                       | CSP40.scaffold01150:122,759-125,524:-1       | 32.8571    | 35.567    |
| Caenorhabditis latens (PRJNA248912)                | 1-to-1    | FL83_16550 (No description)                                                                         | scaffold_152:68,487-71,096:1                 | 28.6713    | 31.701    |
| Caenorhabditis nigoni (PRJNA384657 - JU1422)       | 1-to-1    | Cni-fem-3Cni-fem-3 (No description)                                                                 | CM008512.1:5,362,966-5,367,104:-1            | 34.072     | 31.701    |
| Caenorhabditis remanei (PRJNA53967)                | 1-to-many | WBGene00063901Cre-fem-3.2 Sex determination protein FEM-3 [Source: UniProtKB/TrEMBL; acc: Q563Yd]   | Crem_Contig62:72,510-74,397:1                | 27.5395    | 31.4433   |
| Caenorhabditis sulstoni (PRJEB12601 - JU2788)      | 1-to-1    | CSP32.g12353 (No description)                                                                       | CSP32.scaffold01101:85,534-87,080:-1         | 31.6754    | 31.1856   |
| Caenorhabditis remanei (PRJNA53967)                | 1-to-many | WBGene00073662Cre-fem-3.1 CRE-FEM-3 protein [Source: UniProtKB/TrEMBL; acc: E3NMCS]                 | Crem_Contig611:3,689-6,246:-1                | 26.9663    | 30.9278   |
| Caenorhabditis tropicalis (PRJNA53597)             | 1-to-1    | Csp11.Scaffold629.g10847 (No description)                                                           | Scaffold629:12,602,460-12,605,203:-1         | 20.6597    | 30.6701   |
| Caenorhabditis panamensis (PRJEB28259)             | 1-to-1    | CSP28.g19245 (No description)                                                                       | CSP28.scaffold94_cov83:50,508-52,114:1       | 23.6702    | 22.9381   |
| Caenorhabditis becei (PRJEB28243 - QG2083)         | 1-to-1    | CSP29.g4040 (No description)                                                                        | CSP29.scaffold2337_cov175:610,048-611,842:-1 | 20.4852    | 19.5876   |
| Caenorhabditis waitukubuli (PRJEB12602 - NIC564)   | 1-to-many | CSP39.g24706 (No description)                                                                       | CSP39.scaffold16213:1,639-3,259:1            | 19.5652    | 18.5567   |
| Caenorhabditis waitukubuli (PRJEB12602 - NIC564)   | 1-to-many | CSP39.g13099 (No description)                                                                       | CSP39.scaffold05322:627-1,736:1              | 15.5462    | 9.53608   |
| Caenorhabditis japonica (PRJNA12591)               | 1-to-1    | WBGene00210371Cjp-fem-3 (No description)                                                            | Cjap.Contig18057:7,965-13,175:1              | 10.4046    | 9.27835   |
| Caenorhabditis waitukubuli (PRJEB12602 - NIC564)   | 1-to-many | CSP39.g28022 (No description)                                                                       | CSP39.scaffold19127:1-746:-1                 | 17.5573    | 5.92783   |

**Supplementary Table 6. Orthologues of *C. elegans fem-3*.** Listing from Wormbase Parasite Version WBPS17 of 17 orthologues of *C. elegans fem-3* (C01F6.4a.1), including *Caenorhabditis tropicalis* Csp11.Scaffold629.g10847 (highlighted in green).



|                                                           |
|-----------------------------------------------------------|
| dsRNA-1                                                   |
| Forward: 5'- TAATACGACTCACTATAGGGcgaagaagaagacgaagcag -3' |
| Reverse: 5'- TAATACGACTCACTATAGGGcacattcagcagatgatgcc -3' |
| dsRNA-2                                                   |
| Forward: 5'- TAATACGACTCACTATAGGGatggacgatgatgatcga -3'   |
| Reverse: 5'- TAATACGACTCACTATAGGGcgtatatccccgaattgagg -3' |
| dsRNA-3                                                   |
| Forward: 5'- TAATACGACTCACTATAGGGccaatagtgcaccaaacga -3'  |
| Reverse: 5'- TAATACGACTCACTATAGGGctccgccataacctgtct -3'   |

**Supplementary Table 7. List of primers used for dsRNA synthesis.** The T7 promoter sequence is added to the 5' ends.

## References

1. Gems D, Riddle DL. Longevity in *Caenorhabditis elegans* reduced by mating but not gamete production. *Nature* **379**, 723-725 (1996).
2. Shi C, Murphy CT. Mating induces shrinking and death in *Caenorhabditis* mothers. *Science* **343**, 536-540 (2014).
3. Maures T, Booth L, Benayoun B, Izrayelit Y, Schroeder F, Brunet A. Males shorten the life span of *C. elegans* hermaphrodites via secreted compounds. *Science* **343**, 541-544 (2014).
4. Kern CC, *et al.* *C. elegans* feed yolk to their young in a form of primitive lactation. *Nat Commun* **12**, 5801 (2021).
5. Bansal A, *et al.* Transcriptional regulation of *Caenorhabditis elegans* FOXO/DAF-16 modulates lifespan. *Longev Healthspan* **3**, 5 (2014).
